# Supplementary material
Source: PubMed Central journal article supplement (PMC2723809)
Supplement: NIHMS119401-supplement-1_si_001.pdf [file NIHMS119401-supplement-1_si_001.pdf]

# **“Macrocyclic Design Strategies for Small, Stable Parallel $\beta$ -Sheet Scaffolds”**

*Felix Freire, Samuel H. Gellman\**

*Contribution from the Department of Chemistry, University of Wisconsin,  
Madison, Wisconsin 53706*

E-mail: [gellman@chem.wisc.edu](mailto:gellman@chem.wisc.edu)

## **Supporting Information**

## Synthesis of cyclic peptides.

**Materials.** Novasyn TGR Resin, Novasyn TGA Resin, 2-Chlorotrityl Resin, hydroxybenzotriazole (HOBT), and all protected amino acids were obtained from Novabiochem. Benzotriazol-1-yl-oxytripyrrolidinophosphonium hexafluorophosphate (PyBOP), O-Benzotriazole-N,N,N',N'-tetramethyluronium hexafluorophosphate (HBTU), 1-Ethyl-3-(3-dimethylaminopropyl)carbodiimide hydrochloride (EDC.HCl) were obtained from Chem. Impex. 7-azabenzotriazol-1-yloxy-tris-(pyrrolidino)phosphonium hexafluorophosphate (PyAOP), was obtained from Applied Biosystems. Solvents and all other chemicals were purchased from Aldrich or Fisher and used as received.

## Synthesis of N-to-N linkers.

Scheme 1. Synthesis of the N-to-N linker 1.5.

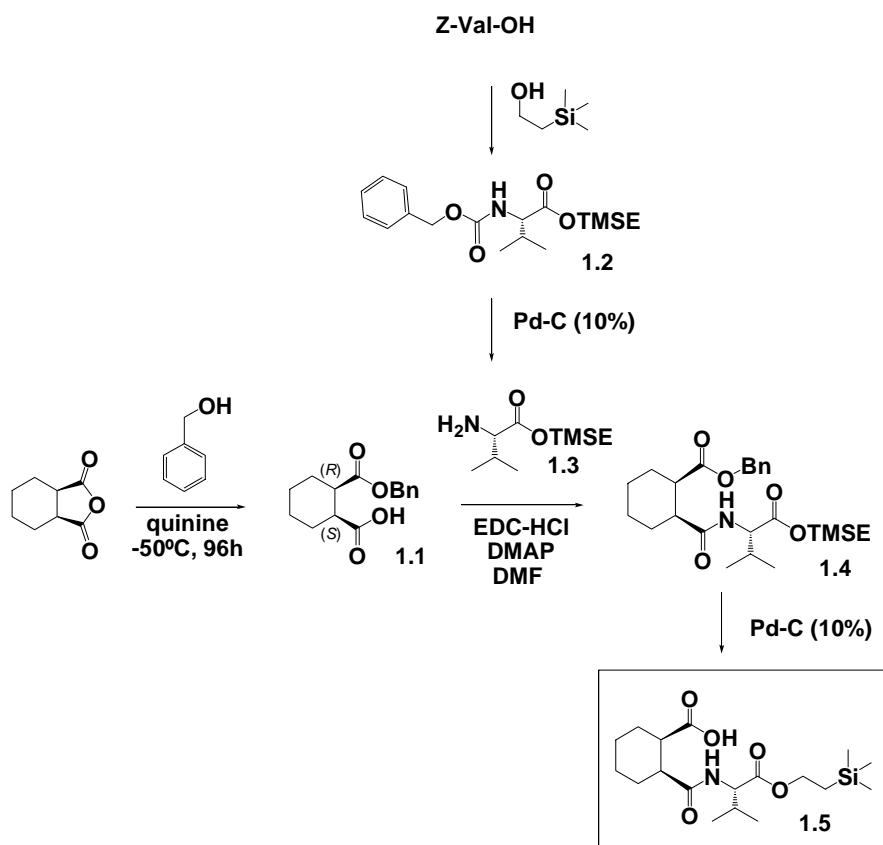

**(1S,2R)-2-((Benzyloxy)carbonyl)cyclohexanecarboxylic acid (1.1)**

(ref. S1) Anhydride **1.1** (3.3 g, 21.4 mmol) and quinidine (7.6 g, 23.6 mmol) were dissolved in 250 mL of freshly distilled toluene under N<sub>2</sub>. The mixture was cooled at -50°C. Benzyl alcohol (6.7 mL, 64.7 mmol) was added as a single portion, and the reaction was allowed to stir for 5 days at -50°C. The toluene was then removed under reduced pressure. The remaining oil was then dissolved in 125 mL of ether. The organic solution was washed with 2 N HCl (3 x 30 mL). The aqueous phase was then back-extracted with ether (5 x 50 mL). These five ether washes were combined and extracted with sat. NaHCO<sub>3(aq)</sub> (5 x 75 mL). The aqueous phase was washed with ether (100 mL) to remove any residual benzyl alcohol, acidified with 8 N HCl and extracted with CH<sub>2</sub>Cl<sub>2</sub> (5 x 100 mL). The organic phase was then dried over Na<sub>2</sub>SO<sub>4</sub>, filtered, and the solvent was removed under reduced pressure to leave 3.36 g of clear oil (60 % yield). <sup>1</sup>H NMR (300 MHz, CDCl<sub>3</sub>) δ 1.23–1.44 (m, 4H), 1.72–1.86 (m, 2H), 1.98–2.10 (m, 2H), 2.82–2.90 (m, 2H), 5.10, 5.15 (AB<sub>q</sub>, *J* = 12.6 Hz, 2H), 7.26–7.38 (m, 5H); <sup>13</sup>C NMR (300 MHz, CDCl<sub>3</sub>) δ 23.87, 23.95, 26.28, 26.48, 42.7, 66.5, 113.0, 128.3, 128.7, 136.2, 173.6, 179.8 ESI-MS calc. [C<sub>15</sub>H<sub>18</sub>O<sub>4</sub>Na]<sup>+</sup> = 285.1103 obs. [C<sub>15</sub>H<sub>18</sub>O<sub>4</sub>Na]<sup>+</sup> = 285.1093

**Z-Val-OTMSE (1.2)**

Z-Val-OH (3 g, 8.33 mmol) was dissolved in 85 mL of CH<sub>2</sub>Cl<sub>2</sub>. 2-Trimethylsilylethanol (1.25 g, 10.6 mmol), EDC (2.032 g, 10.6 mmol) and DMAP (cat.) were added to the solution, and the mixture was stirred at room temperature for 14 h. The reaction mixture was washed with 1 N HCl (3 x 100 mL), sat. NaHCO<sub>3(aq)</sub> (3 x 100 mL) and brine (1 x 100 mL). The organic phase was dried over Na<sub>2</sub>SO<sub>4</sub> and concentrated under reduced pressure to leave clear oil. Purification by chromatography on silica gel (EtOAc-Hexanes, 3:7), afforded 3.360 g of clear oil (87 % yield). <sup>1</sup>H NMR (300 MHz, CDCl<sub>3</sub>): 0.00 (s, 9H), 0.87 (d, *J* = 6.9 Hz, 3H), 0.93 (d, *J* = 6.9 Hz, 3H), 0.89-1.01 (m, 2H), 2.07-2.18 (m, 1H), 4.16-4.25 (m, 3H), 4.33-4.36 (m, 2H), 5.27 (d, *J* = 9.1 Hz, 3H), 7.23-7.36 (m, 4H), 7.55 (d, *J* = 7.3 Hz, 2H), 7.70 (d, *J* = 7.6 Hz, 2H). <sup>13</sup>C NMR (300 MHz, CDCl<sub>3</sub>) 0.0, 19.0, 19.1, 20.5, 32.9, 48.8, 60.6, 65.6, 68.5, 121.5, 126.6, 128.5, 129.2, 130.2, 142.8, 143.3, 145.5, 157.7, 168.7, 173.7 ESI-MS calc. [C<sub>25</sub>H<sub>33</sub>NO<sub>4</sub>SiNa]<sup>+</sup> = 462.2072 obs. [C<sub>25</sub>H<sub>33</sub>NO<sub>4</sub>SiNa]<sup>+</sup> = 462.2082

**H-Val-OTMSE (1.3)**

Protected amino acid **1.2** (1.0 g) was dissolved in 10 mL of 4.4 % formic acid-methanol. This solution was added to a round bottom flask containing 1.0 g of (Pd-C 10 %) and 50 mL of 4.4 % formic acid-MeOH. The mixture was allowed to stir overnight under an N<sub>2</sub> atmosphere. The suspension was filtered, and the solvent was removed under reduced pressure yielding **1.3** (643 mg, 80 %).

<sup>1</sup>H NMR (300 MHz, CDCl<sub>3</sub>): 0.00 (s, 9H), 0.85 (d, *J* = 6.9 Hz, 3H), 0.93 (d, *J* = 6.6 Hz, 3H), 0.93-0.99 (m, 2H), 1.92-2.03 (m, 1H), 3.21 (d, *J* = 4.7 Hz, 1H), 4.13-4.19 (m, 2H). <sup>13</sup>C NMR (300 MHz, CDCl<sub>3</sub>) 0.0, 18.7, 20.8, 33.7, 51.5, 64.5, 177.1 ESI-MS calc. [C<sub>25</sub>H<sub>33</sub>NO<sub>4</sub>SiNa]<sup>+</sup> = 240.1498 obs. [C<sub>25</sub>H<sub>33</sub>NO<sub>4</sub>SiNa]<sup>+</sup> = 240.0568

**BnO-(1S,2R)-CHDA-Val-OTMSE (1.4)**

Compound **1.1** (1.0 g, 3.82 mmol) and **1.3** (0.994 g, 4.578 mmol) were dissolved in 46 mL CH<sub>2</sub>Cl<sub>2</sub>. PyBOP (2.38 g, 4.578 mmol), and DMAP (cat) were added to the solution, which was allowed to stir for 48 h. The solution was washed with 1 N HCl (3 x 100 mL), sat. NaHCO<sub>3</sub> (aq) (2 x 100 mL) and brine (1 x 100 mL). The organic phase was dried over Na<sub>2</sub>SO<sub>4</sub> and concentrated under reduced pressure to leave an orange oil. Purification by chromatography on silica gel (EtOAc-Hexanes, 3:7), afforded 1.02 g of white solid product (62 % yield).

<sup>1</sup>H NMR (300 MHz, CDCl<sub>3</sub>) δ 0.00 (s, 9H), 0.87 (d, *J* = 6.9 Hz, 3H), 0.88 (d, *J* = 6.9 Hz, 3H), 0.93-0.99 (m, 2H), 1.31-1.55 (m, 3H), 1.57-1.78 (m, 3H), 2.01-2.13 (m, 3H), 2.66-2.72 (m, 1H), 2.85-2.91 (m, 1H), 4.13-4.19 (m, 2H), 4.48 (dd, *J* = 4.7 and 8.4 Hz, 1H), 5.04 (d, *J* = 12.4 Hz, 1H), 5.08 (d, *J* = 12.4 Hz, 1H), 6.20 (d, *J* = 8.8 Hz, 1H), 7.22-7.31 (m, 5H) <sup>13</sup>C NMR (300 MHz, CDCl<sub>3</sub>) δ 0.0, 19.0, 19.3, 20.4, 25.0, 25.3, 28.2, 28.4, 33.0, 44.0, 45.4, 58.3, 65.0, 67.6, 129.5, 130.0, 137.8, 173.7, 174.7, 157.4 ESI-MS calc. = [C<sub>25</sub>H<sub>39</sub>NO<sub>5</sub>SiNa]<sup>+</sup> = 484.2490 obs. [C<sub>21</sub>H<sub>30</sub>N<sub>2</sub>O<sub>4</sub>Na]<sup>+</sup> = 484.2501

**HO-(1S,2R)-CHDA-Val-OTMSE (1.5)**

Protected peptide **1.4** (1.0 g) was dissolved in 10 mL of 4.4 % formic acid-methanol. This solution was added to a round bottom flask containing 1.0 g of (Pd-C 10 %) and 50 mL of 4.4 % formic acid-MeOH. The mixture was allowed to stir overnight under an N<sub>2</sub> atmosphere. The suspension was filtered, and the solvent was removed under reduced pressure yielding pure compound **1.5** as a clear oil (765 mg, 95%).

<sup>1</sup>H NMR (300 MHz, CDCl<sub>3</sub>) δ 0.05 (s, 9H), 0.91 (d, *J* = 7.3 Hz, 3H), 0.93 (d, *J* = 6.9 Hz, 3H) 0.99-1.04 (m, 2H), 1.38-1.84 (m, 6H), 1.88-1.97 (m, 1H), 2.07-2.15 (m, 2H), H), 2.63-2.69 (m, 1H), 2.88-2.92 (m, 1H), 4.15-4.21 (m, 2H), 4.48 (dd, *J* = 4.7 Hz and 8.4 Hz, 1H), 6.32 (d, *J* = 8.8 Hz, 1H). <sup>13</sup>C NMR (300 MHz, CDCl<sub>3</sub>) δ 0.0, 19.1, 19.3, 20.4, 24.9, 35.4, 28.4, 29.0, 32.9, 44.4, 45.7, 58.7, 65.4, 173.7, 176.2, 179.0 ESI-MS calc. = [C<sub>18</sub>H<sub>33</sub>NO<sub>5</sub>SiNa]<sup>+</sup> = 394.2021 obs. [C<sub>18</sub>H<sub>33</sub>NO<sub>5</sub>SiNa]<sup>+</sup> = 394.2004

**Scheme 2. Synthesis of the N-to-N linker 2.3.**

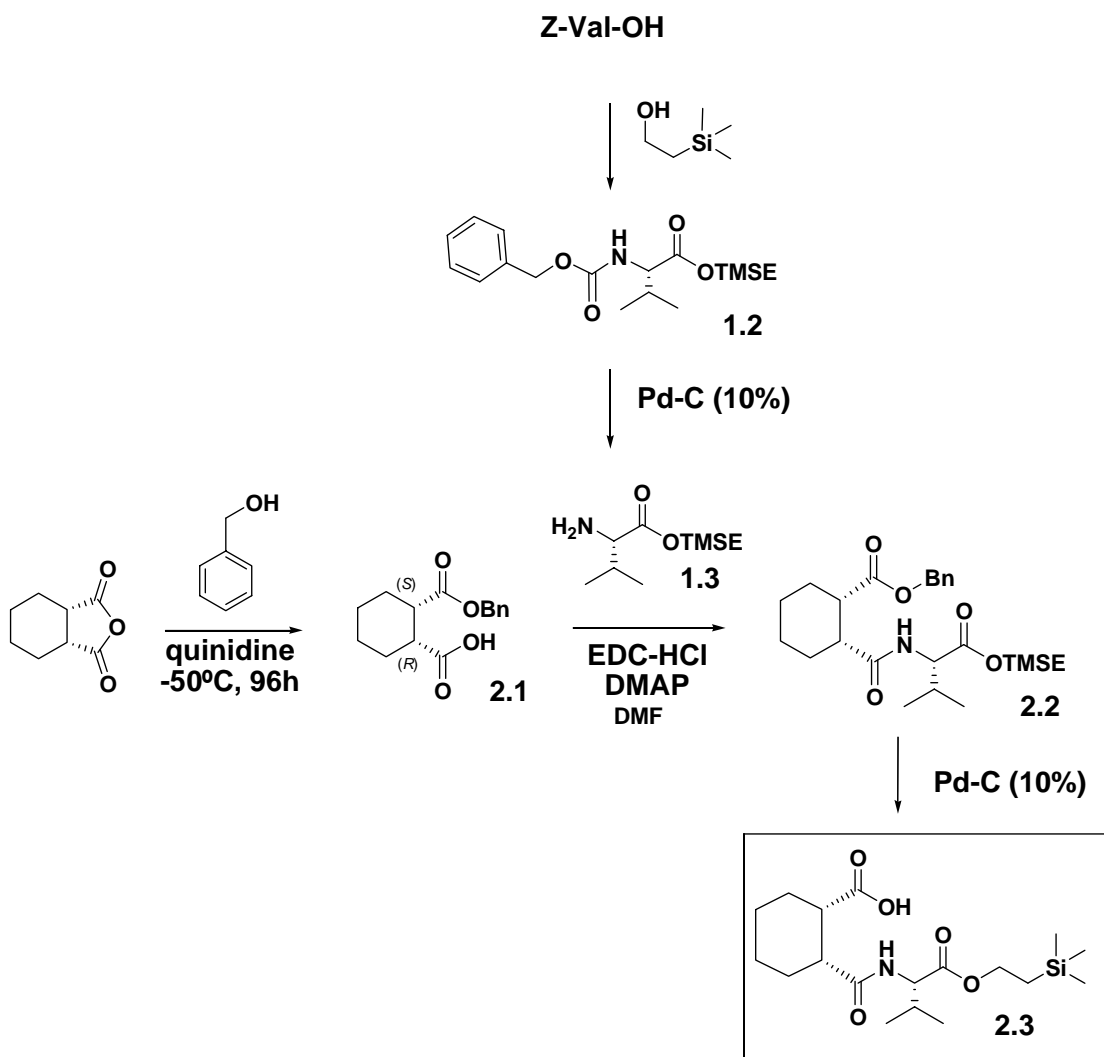

**(1*R*,2*S*)-2-((Benzyloxy)carbonyl)cyclohexanecarboxylic acid (2.1)**

Compound **1.1** (3.3 g, 21.4 mmol) and quinine (7.6 g, 23.6 mmol) were dissolved in 100 mL of freshly distilled toluene under N<sub>2</sub>. The mixture was cooled at -50 °C. Benzyl alcohol (6.7 mL) was added as a single portion and the reaction was allowed to stir for 5 days at -50°C. The toluene was then removed under reduced pressure. The remaining oil was then dissolved in 125 mL of ether. The organic solution was washed with 2 N HCl (3 x 30 mL). The aqueous phase was then back extracted with ether (5 x 50 mL). The combined organic layers were extracted with sat. NaHCO<sub>3(aq)</sub> (5 x 75 mL). The aqueous phase was washed with ether (100 mL) to remove any residual benzyl alcohol, acidified with 8 N HCl and extracted with CH<sub>2</sub>Cl<sub>2</sub> (5 x 100 mL). The organic phase was then dried over Na<sub>2</sub>SO<sub>4</sub>, filtered, and the solvent was removed under reduced pressure to leave 3.36 g of clear oil (60 % yield).

$^1\text{H}$  NMR (300 MHz,  $\text{CDCl}_3$ )  $\delta$  1.23–1.44 (m, 4H), 1.72–1.86 (m, 2H), 1.98–2.10 (m, 2H), 2.82–2.90 (m, 2H), 5.10, 5.15 (AB<sub>q</sub>,  $J$  = 12.6 Hz, 2H), 7.26–7.38 (m, 5H)  $^{13}\text{C}$  NMR (300 MHz,  $\text{CDCl}_3$ )  $\delta$  23.90, 23.94, 26.31, 26.48, 42.6, 42.7, 66.6, 128.3, 128.7, 136.3, 173.6, 178.9 ESI-MS calc.  $[\text{C}_{15}\text{H}_{18}\text{O}_4\text{Na}]^+ = 285.1103$  obs.  $[\text{C}_{15}\text{H}_{18}\text{O}_4\text{Na}]^+ = 285.1095$

### **BnO-(1*R*,2*S*)-CHDA-Val-OTMSE (2.2)**

Compound **2.1** (1.0 g, 3.82 mmol) and **1.3** (0.994 g, 4.578 mmol) were dissolved in 46 mL  $\text{CH}_2\text{Cl}_2$ . PyBOP (2.38 g, 4.578 mmol), and DMAP (cat) were added to the solution, which was allowed to stir for 48 h. The solution was washed with 1 N HCl (3 x 100 mL), sat.  $\text{NaHCO}_3$  (aq) (2 x 100 mL) and brine (1 x 100 mL). The organic phase was dried over  $\text{Na}_2\text{SO}_4$  and concentrated under reduced pressure to leave a orange oil. The product was purified by silica column chromatography (EtOAc-Hexanes, 3:7), yielding 1.00 g of white solid product (60 % yield).

$^1\text{H}$  NMR (300 MHz,  $\text{CDCl}_3$ )  $\delta$  0.00 (s, 9H), 0.85 (d,  $J$  = 6.9 Hz, 3H), 0.98 (d,  $J$  = 6.9 Hz, 3H), 0.93-0.99 (m, 2H), 1.31-1.77 (m, 6H), 2.06-2.15 (m, 3H), 2.67-2.72 (m, 1H), 2.85-2.90 (m, 1H), 4.13-4.18 (m, 2H), 4.48 (dd,  $J$  = 4.4 and 8.4 Hz, 1H), 5.04 (d,  $J$  = 12.1 Hz, 1H), 5.08 (d,  $J$  = 12.3 Hz, 1H), 6.21 (d,  $J$  = 8.8 Hz, 1H), 7.20-7.31 (m, 5H)  $^{13}\text{C}$  NMR (300 MHz,  $\text{CDCl}_3$ )  $\delta$  0.0, 0.3, 19.0, 19.3, 20.4, 25.0, 25.3, 28.2, 28.4, 33.0, 44.0, 45.4, 58.3, 65.0, 67.6, 129.5, 129.9, 137.8, 173.7, 174.7, 157.4 ESI-MS calc. =  $[\text{C}_{25}\text{H}_{39}\text{NO}_5\text{SiNa}]^+ = 484.2490$  obs.  $[\text{C}_{21}\text{H}_{30}\text{N}_2\text{O}_4\text{Na}]^+ = 484.2501$

### **HO-(1*S*,2*R*)-CHDA-Val-OTMSE (2.3)**

Protected peptide **2.2** (1 g) was dissolved in 10 mL of 4.4 % formic acid-methanol. This solution was added to a round bottom flask containing 1 g of (Pd-C 10 %) and 50 mL of 4.4 % formic acid-MeOH. The mixture was allowed to react overnight under an  $\text{N}_2$  atmosphere. The suspension was filtered and the solvent was removed under reduced pressure yielding pure compound **2.3** (805 mg, 80 %).

$^1\text{H}$  NMR (300 MHz,  $\text{CDCl}_3$ )  $\delta$  0.05 (s, 9H), 0.91 (d,  $J$  = 6.9 Hz, 3H), 0.93 (d,  $J$  = 6.9 Hz, 3H) 0.99-1.05 (m, 2H), 1.38-1.52 (m, 2H), 1.59-1.81 (m, 4H), 1.93-2.03 (m, 1H), 2.12-2.24 (m, 1H), 2.73-2.78 (m, 1H), 2.82-2.87 (m, 1H), 4.22-4.26 (m, 2H), 4.52 (dd,  $J$  = 4.7 Hz and 8.4 Hz, 1H), 6.33 (d,  $J$  = 8.8 Hz, 1H).  $^{13}\text{C}$  NMR (300 MHz,  $\text{CDCl}_3$ )  $\delta$  0.0, 19.1, 19.3, 20.4, 24.9, 35.4, 28.4, 29.0, 32.9, 44.4, 45.7, 58.7, 65.4, 173.7, 176.2, 179.0 ESI-MS calc. =  $[\text{C}_{18}\text{H}_{33}\text{NO}_5\text{SiNa}]^+ = 394.2021$  obs.  $[\text{C}_{18}\text{H}_{33}\text{NO}_5\text{SiNa}]^+ = 394.2004$

### **Scheme 3. Synthesis of the N-to-N linker 3.1.**

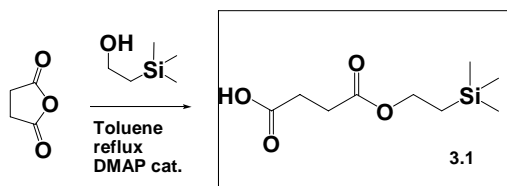

### 3-((2-(Trimethylsilyl)ethoxy)carbonyl)propanoic acid (**3.1**)

Succinic anhydride (2 g, 20.0 mmol) and was dissolved in toluene (20 mL). 2-Trimethylsilylethanol (1.25 g, 10.6 mmol) and DMAP (cat.) were added to the solution, and the mixture was stirred at reflux for 14 h. The solution was washed with 1 N HCl (3 x 100 mL), and brine (1 x 100 mL). The organic phase was dried over Na<sub>2</sub>SO<sub>4</sub> and concentrated under reduced pressure to leave compound **3.1** as a clear oil (4.3 g, 99 %). <sup>1</sup>H NMR (300 MHz, CDCl<sub>3</sub>) δ 0.01 (s, 9H), 0.95 (m, 2H), 2.55 (m, 2H), 2.63 (m, 2H), 4.14 (m, 2H). <sup>13</sup>C NMR (300 MHz, CDCl<sub>3</sub>) δ 0.0, 18.82, 30.46, 30.84, 64.45, 64.58, 173.77, 179.48 ESI-MS calc. = [C<sub>18</sub>H<sub>33</sub>NO<sub>5</sub>SiNa]<sup>+</sup> = 241.0974 obs. [C<sub>18</sub>H<sub>33</sub>NO<sub>5</sub>SiNa]<sup>+</sup> = 241.0032.

### Scheme 4. Synthesis of the C-to-C linker **4.6**.

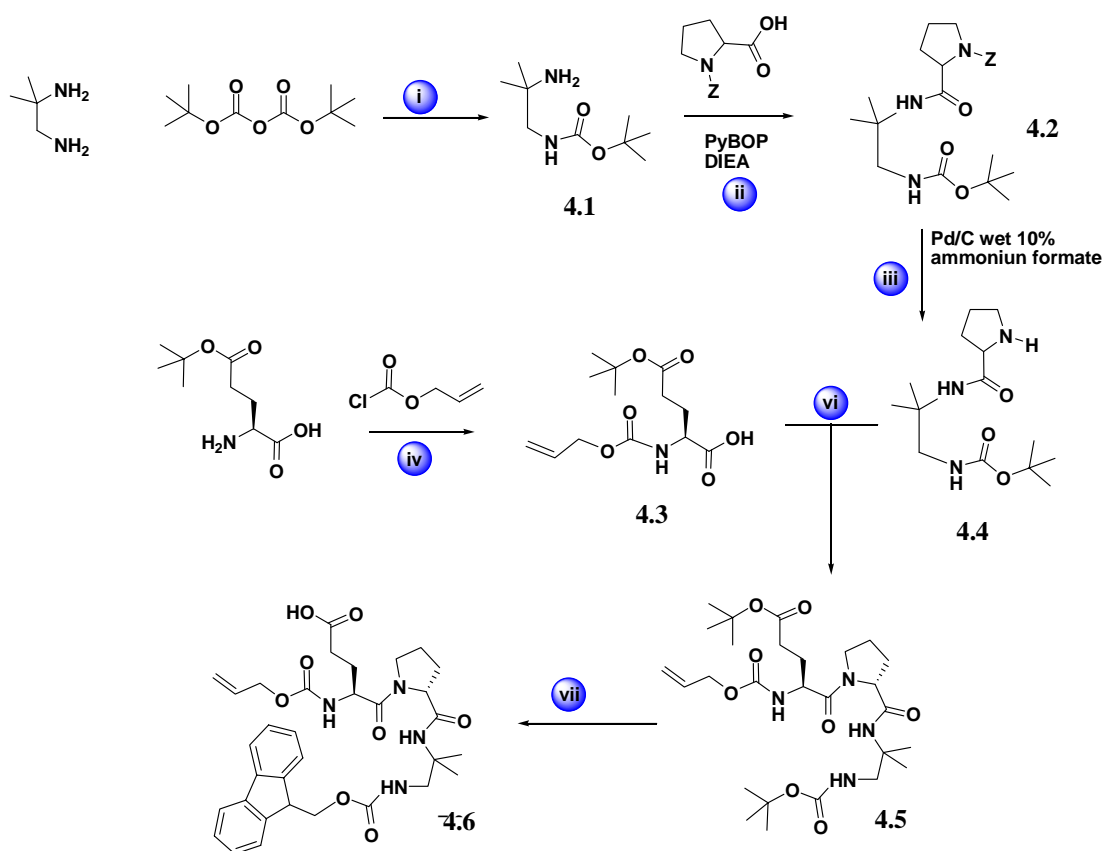

This material was prepared as described in the supporting information of Ref. The steps indicated in Scheme 4 are summarized below:

i) 2-Methyl-1,2-diaminopropane (4 ml, 38.2 mmol), (Boc)<sub>2</sub>O (2.94 g), CH<sub>2</sub>Cl<sub>2</sub> (150 mL). 70 % yield. ii) **4.1** (2.73 g, 15.4 mmol), Z-DPro-OH (4.6 g, 18.5 mmol), PyBOP (9.6 g, 18.5 mmol), DIEA (4.3 mL, 18.5 mmol), CH<sub>2</sub>Cl<sub>2</sub> (100 mL); 72 % yield. iii) **4.2** (4.25 g, 10.3 mmol), ammonium formate (3.26 g, 51.7 mmol), Pd-C (wet 10 %) (3 g), MeOH (150 mL); 90 % yield. iv) H-Glu(O<sup>t</sup>Bu)-OH (2.02 g, 11.8 mmol), dioxane (60 mL), sat.

aq. NaHCO<sub>3</sub> (20 mL), allyloxy chloroformate (1.3 mL, 11.8 mmol); 90 % yield. v) **4.3** (2.59 g, 9.08 mmol), **4.4** (3.13 g, 10.89 mmol), PyBOP ( 5.66 g, 10.89 mmol), DIEA (1.42 g, 10.89 mmol), CH<sub>2</sub>Cl<sub>2</sub> (90 ml); 80 % yield. vi) a) **4.5** (4 g, 7.25 mmol), 4 N HCl in Dioxane (40 mL). 1.5h; remove solvent under reduced pressure; b) acetone (500 mL), 1 N NaHCO<sub>3</sub> (100 mL), Fmoc-OSu (2.55 g, **4.6** mmol), 4 h; 90 % yield.

### Scheme 5. Synthesis of the C-to-C linker 5.6.

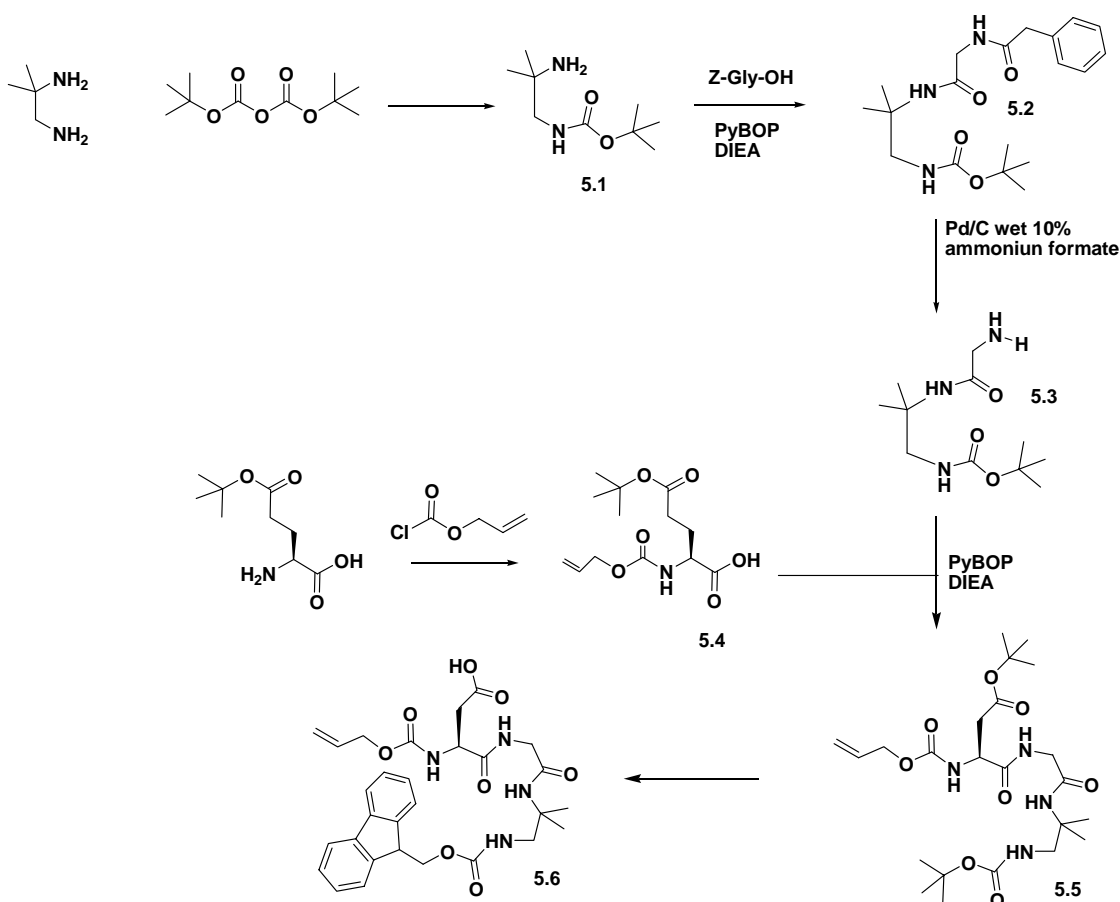

#### Tert-butyl-2-amino-2-methylpropylcarbamate (H-Dadme-Boc) **5.1**

2-Methyl-1,2-diaminopropane (4 mL) was dissolved in 160 mL of CH<sub>2</sub>Cl<sub>2</sub>. (Boc)<sub>2</sub>O (2.95 g, 13.5 mmol) was added dropwise as a solution in 150 mL of CH<sub>2</sub>Cl<sub>2</sub> (over 6 h). The mixture (white suspension) was stirred for 18 h and then transferred to a separatory funnel and extracted with aqueous NaHCO<sub>3</sub> (10%). The aqueous layer was then back-extracted with CH<sub>2</sub>Cl<sub>2</sub>. The combined organic layers were dried over MgSO<sub>4</sub>, filtered and evaporated, to leave compound **5.1** as clear oil (4 g, 56 %).



$^1\text{H}$  NMR (300 MHz,  $\text{CDCl}_3$ )  $\delta$  1.09 (s, 6H), 1.46 (s, 9H), 3.01 (s, 2H).  $^{13}\text{C}$  NMR (300 MHz,  $\text{CDCl}_3$ )  $\delta$  28.5, 50.3, 52.4, 79.2, 156.6 ESI-MS calc. =  $[\text{C}_9\text{H}_{20}\text{N}_2\text{O}_2\text{Na}]^+ = 211.2673$  obs.  $[\text{C}_9\text{H}_{20}\text{N}_2\text{O}_2\text{Na}]^+ = 211.0561$ .

### Z-Gly-Dadme-Boc 5.2

H-Dadme-Boc (2 g, 11.29 mmol) and Z-Gly-OH (2.83, 13.5 mmol) were dissolved in 120 mL of  $\text{CH}_2\text{Cl}_2$ . PyBOP (7.04 g, 13.54 mmol) and DIEA (1.76 g, 13.54 mmol) were added to the solution, which was allowed to stir for 4 h. The solution was washed with 1 N HCl (3 x 100 mL), sat.  $\text{NaHCO}_3$  (aq) (2 x 100 mL) and brine (1 x 100 mL). The organic phase was dried over  $\text{Na}_2\text{SO}_4$  and concentrated under reduced pressure to leave an orange oil. This material was purified by silica column chromatography (EtOAc-Hexanes, 2:8), to yield 4.10 g of white solid product (100 % yield).

$^1\text{H}$  NMR (300 MHz,  $\text{CDCl}_3$ )  $\delta$  1.27 (s, 6H), 1.40 (s, 9H), 3.21 (d,  $J = 6.2$  Hz, 2H), 3.73 (d,  $J = 5.5$  Hz, 2H), 5.09 (s, 2H), 5.32 (br s, 1H), 5.61 (br s, 1H), 6.73 (s, 1H), 7.25-7.34 (m, 5H).  $^{13}\text{C}$  NMR (300 MHz,  $\text{CDCl}_3$ )  $\delta$  24.4, 28.4, 45.0, 49.6, 55.5, 67.1, 79.8, 128.1, 128.6, 136.3, 156.7, 157.4, 168.8. ESI-MS calc. =  $[\text{C}_{19}\text{H}_{23}\text{N}_3\text{O}_4\text{Na}]^+ = 386,2518$ , obs.  $[\text{C}_{19}\text{H}_{23}\text{N}_3\text{O}_4\text{Na}]^+ = 386,0853$ .

### H-Gly-Dadme-Boc 5.3

Protected molecule **5.2** (3 g) was dissolved in 20 mL of 4.4 % formic acid-methanol. This solution was added to a round bottom flask containing 2 g of (Pd-C 10 %) and 100 mL of 4.4 % formic acid-MeOH. The mixture was allowed to stir overnight under an  $\text{N}_2$  atmosphere. The suspension was filtered, and the solvent was removed from the filtrate under reduced pressure yielding pure compound **5.3** (2.3 g, 80 %).

$^1\text{H}$  NMR (300 MHz,  $\text{CDCl}_3$ )  $\delta$  1.31 (s, 6H), 1.44 (s, 9H), 2.71-2.83 (m, 2H), 3.22-3.38 (m, 2H), 5.44-5.48 (m, 1H), 7.33 (s, 1H).  $^{13}\text{C}$  NMR (300 MHz,  $\text{CDCl}_3$ )  $\delta$  25.0, 28.5, 45.0, 49.5, 54.4, 79.3, 156.9, 172.2. ESI-MS calc. =  $[\text{C}_{11}\text{H}_{23}\text{N}_3\text{O}_3\text{Na}]^+ = 267.1661$ , obs.  $[\text{C}_{11}\text{H}_{23}\text{N}_3\text{O}_3\text{Na}]^+ = 266.9985$ .

### Alloc-Glu(O<sup>t</sup>Bu)-OH 5.4

H-Glu(O<sup>t</sup>Bu)-OH (2.02 g, 9.84 mmol) was dissolved in 60 mL of dioxane and 20 mL of sat. aqueous  $\text{NaHCO}_3$ . Allyloxy chloroformate was added as a single portion (1.3 mL, 12.2 mmol). The opaque mixture was stirred for 24 h and then transferred to a separatory funnel and acidified with 1 N HCl. The solution was extracted with 3 x 100  $\text{CH}_2\text{Cl}_2$ . The combined organic layers were dried over  $\text{MgSO}_4$ , filtered and evaporated, to leave compound **5.4** as a clear oil (3.1 g, 100%).

$^1\text{H}$  NMR (300 MHz,  $\text{CDCl}_3$ )  $\delta$  1.45 (s, 9H), 1.94-2.06 (m, 1H), 2.14-2.26 (m, 1H), 2.30-2.50 (m, 2H), 4.34-4.41 (m, 1H), 4.58 (d,  $J = 5.1$  Hz, 2H), 5.20-5.30 (m, 2H), 5.53 (d,  $J = 7.3$  Hz, 1H), 5.84-5.97 (m, 1H).  $^{13}\text{C}$  NMR (300 MHz,  $\text{CDCl}_3$ )  $\delta$  27.3, 28.0, 31.5, 65.9, 66.9, 81.0, 117.8, 132.4, 156.0, 172.3, 175.2. ESI-MS calc. =  $[\text{C}_{13}\text{H}_{21}\text{NO}_6\text{Na}]^+ = 310.1369$ , obs.  $[\text{C}_{13}\text{H}_{21}\text{NO}_6\text{Na}]^+ = 310.1195$ .

### **Alloc-Glu(O<sup>t</sup> Bu)- Gly-Dadme-Boc 5.5**

Alloc-Glu(O<sup>t</sup> Bu)-OH **5.4** (3.23 g, 11.25 mmol) and H-Gly-Dadme-Boc **5.3** (2.3 g, 9.38 mmol), were dissolved in 100 mL of CH<sub>2</sub>Cl<sub>2</sub>. PyBOP (5.85 g, 11.25 mmol), and DIEA (3.37 g, 11.25 mmol) were added to the solution, which was allowed to stir for 12 h. The solution was washed with 1 N HCl (3 x 100 mL), sat. NaHCO<sub>3</sub> (aq) (2 x 100 mL) and brine (1 x 100 mL). The organic phase was dried over Na<sub>2</sub>SO<sub>4</sub> and concentrated under reduced pressure to leave an orange oil. Purification by chromatography on silica gel (EtOAc-Hexanes, 3:7), afforded 3 g of white solid product (65 % yield).

<sup>1</sup>H NMR (300 MHz, CDCl<sub>3</sub>) δ 1.31 (s, 6H), 1.44 (s, 9H), 1.90-2.03 (m, 1H), 2.04-2.17 (m, 1H), 2.25-2.46 (m, 2H), 3.27 (d, *J* = 6.2 Hz, 1H), 3.75-3.92 (m, 1H), 4.17-4.23 (m, 1H), 4.50-4.62 (m, 2H), 5.19-5.32 (m, 2H), 5.37-5.40 (m, 1H), 5.83-5.96 (m, 1H), 6.02 (d, *J* = 6.2 Hz, 1H), 6.71 (s, 1H), 7.12-7.14 (m, 1H). <sup>13</sup>C NMR (300 MHz, CDCl<sub>3</sub>) δ 14.4, 21.2, 24.6, 28.3, 28.6, 43.8, 49.4, 55.2, 60.6, 66.2, 81.3, 118.2, 132.6, 157.4, 168.6, 171.3, 172.3. ESI-MS calc. = [C<sub>23</sub>H<sub>40</sub>N<sub>4</sub>O<sub>8</sub>Na]<sup>+</sup> = 523.2846, obs. [C<sub>23</sub>H<sub>40</sub>N<sub>4</sub>O<sub>8</sub>Na]<sup>+</sup> = 523.1956.

### **Alloc-Glu(OH)- Gly-Dadme-Fmoc 5.6**

Alloc-Glu(O<sup>t</sup> Bu)-Gly-Dadme-Boc **5.5** (3 g, 5.99 mmol) was dissolved in 40 mL of 4 N HCl in dioxane, and the solution was stirred for 1.5 h. HCl-dioxane was removed with a high vacuum rotavapor. The resulting solid was resuspended in aAcetone (200 mL), and 100 mL of 1 N aqueous NaHCO<sub>3</sub> was added. Fmoc-OSu (1.05 eq) was added, and the mixture was stirred for 4 h. The acetone was removed by using a rotavapor. The remaining liquid was transferred to a separatory funnel, acidified and extracted with EtOAc (3 x 100 mL). The organic phase was dried over Na<sub>2</sub>SO<sub>4</sub> and concentrated under reduced pressure to leave 2 g of clear oil (compound **5.6**).

<sup>1</sup>H NMR (300 MHz, CDCl<sub>3</sub>) δ 1.15 (s, 3H), 1.29 (s, 3H), 1.83-2.16 (m, 2H), 2.43-2.46 (m, 2H), 3.36 (d, *J* = 6.2 Hz, 1H), 3.64-3.93 (m, 1H), 4.17-4.22 (m, 1H), 4.30-4.55 (m, 4H), 5.10-5.32 (m, 2H), 5.70-5.80 (m, 1H), 6.06 (d, *J* = 6.2 Hz, 1H), 6.36 (d, *J* = 6.9 Hz, 1H), 6.45 (s, 1H), 6.75 (s, 1H), 7.26-7.40 (m, 4H), 7.73-7.75 (m, 2H). <sup>13</sup>C NMR (300 MHz, CDCl<sub>3</sub>) δ 24.7, 25.6, 26.2, 47.4, 58.3, 66.3, 67.0, 109.0, 111.2, 118.2, 120.2, 125.3, 127.3, 127.9, 128.0, 132.5, 141.5, 141.6, 144.0, 166.0, 169.5, 172.7, 172.9. ESI-MS calc. = [C<sub>29</sub>H<sub>34</sub>N<sub>4</sub>O<sub>8</sub>Na]<sup>+</sup> = 589.6023, obs. [C<sub>29</sub>H<sub>34</sub>N<sub>4</sub>O<sub>8</sub>Na]<sup>+</sup> = 589.3556.

*Structures of macrocycles 10 and 11, which are diastereomers of macrocycles 1 and 2 (see Fig 1 in the main text), respectively.*

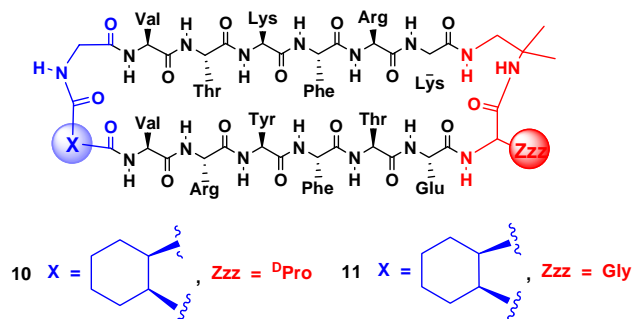

**Figure 1S.** Macrocycles 10-11.

**Scheme 6. Synthesis of the cyclic peptides**

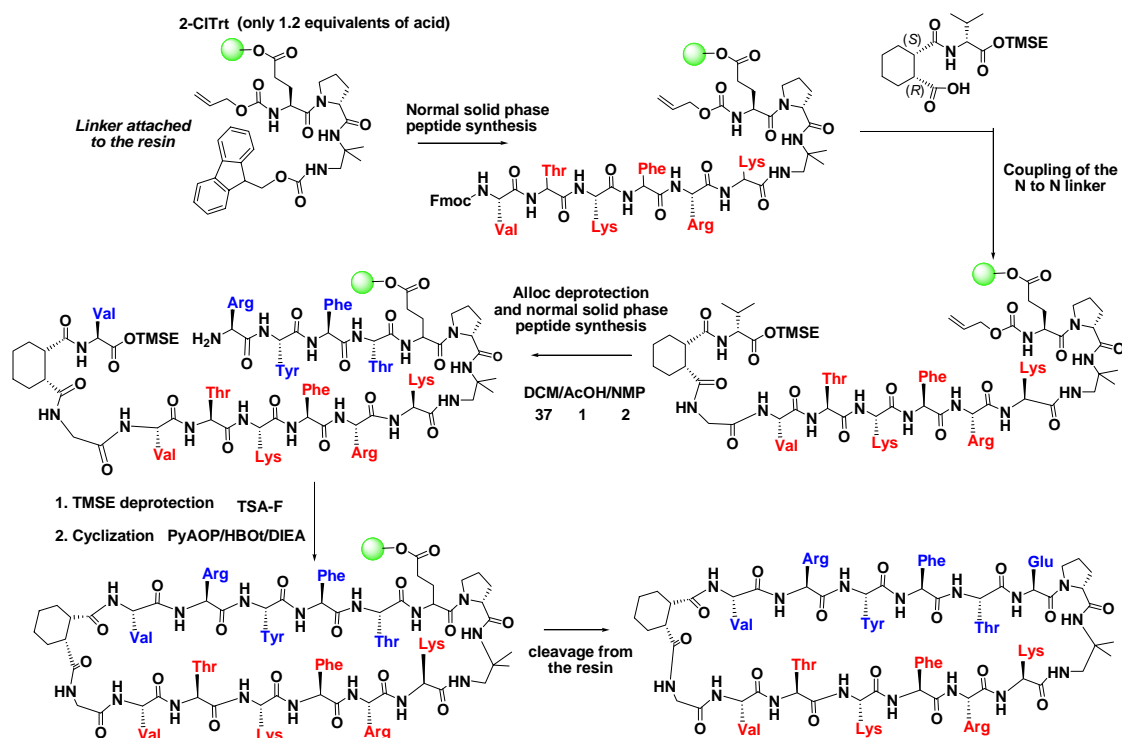

Synthesis of cyclic peptides **1**, **3**, and **10** began with the preparation in solution of the fragment Alloc-Glu-Val-D-Pro-DADME-Fmoc (**4.6**), summarized in Scheme 4. Synthesis of cyclic peptides **2**, **4**, and **11** began with the preparation in solution of the fragment Alloc-Glu-Val-Gly-DADME-Fmoc (**5.6**), summarized in Scheme 5. This

fragment was attached to Nova Syn TGA resin via the Glu side chain carboxyl group, and residues corresponding to Lys(1) to Gly(7) were appended via Fmoc-based solid phase synthesis, using standard Fmoc procedures. Fmoc amino acids were activated as HOBT esters with HBTU and DIEA. All amino acids with reactive side chains were protected. The N-to-N linker unit, **2.3** (Scheme 2) or **1.5** (Scheme 1) or **3.1** (Scheme 3)) was treated as an amino acid and coupled to Gly(7) using the same protocol employed for other couplings. The alloc protecting group was removed with Pd<sup>0</sup> catalyst, and the amino acid residues corresponding to Thr(13) through Arg(10) in peptides **1-2** and **10-11**, or Thr(13) through Val (9) in peptides **3** and **4**, were introduced via standard methods. The Fmoc was removed from Arg(10) or Val(9), TSAF (4 eq., 4 h) was used to remove the TMSE protecting group, and cyclization was achieved on resin with standard coupling reagents (PyAOP, HOBT, DIEA in DMF).

**Scheme 7. Synthesis of the C-to-C linker 7.6.**

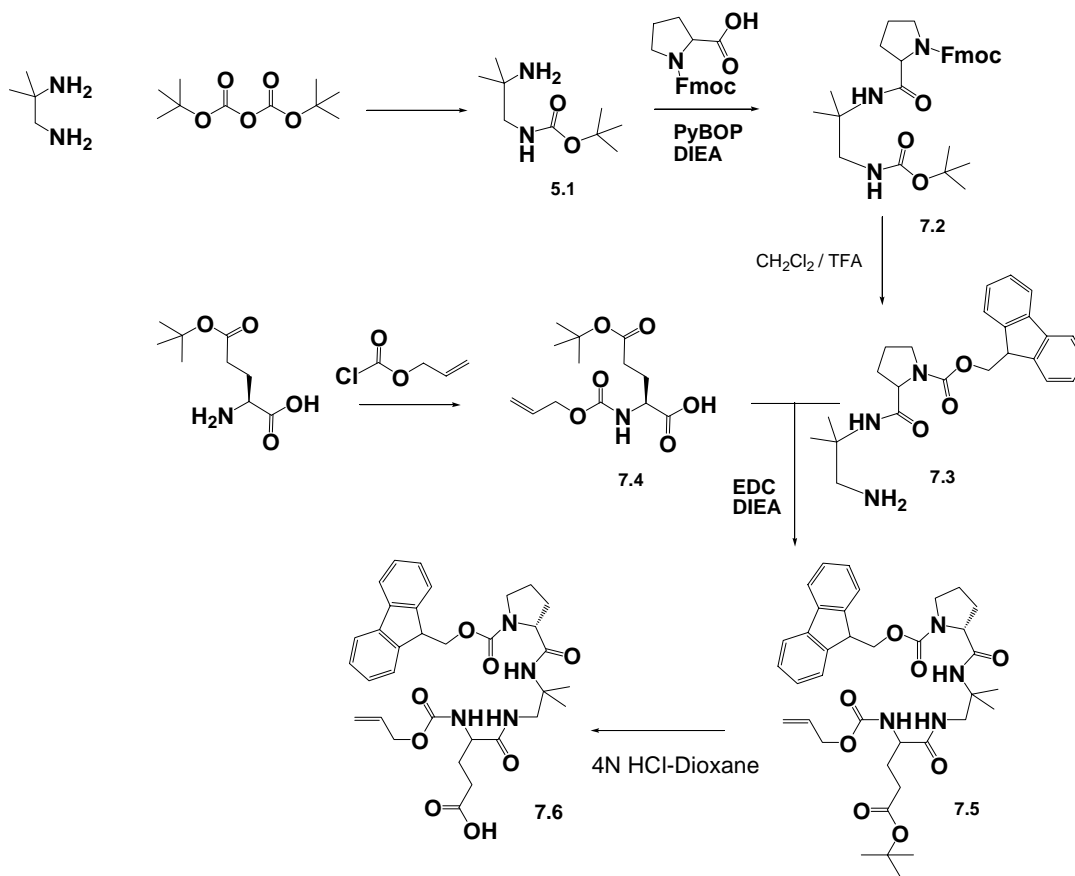

i) 2-Methyl-1,2-diaminopropane (4 ml, 38.2 mmol), (Boc)<sub>2</sub>O (2.94 g), CH<sub>2</sub>Cl<sub>2</sub> (150 ml). 70 % yield. ii) **7.1** (2.72 g, 15.4 mmol), Fmoc-DPro-OH (6.2 g, 18.48), PyBOP (9.6 g, 18.5 mmol), DIEA (4.3 mL, 18.5 mmol) CH<sub>2</sub>Cl<sub>2</sub> (100 ml). 72 % yield. iii) CH<sub>2</sub>Cl<sub>2</sub>:TFA (1:1) iv) H-Glu(O<sup>t</sup>Bu)-OH (2.02 g, 11.8 mmol), Dioxane (60mL), NaHCO<sub>3</sub> sat (20mL), Allyloxy chloroformate (1.3 mL, 11.8 mmol). 90 % yield. v) **7.3** (2.00 g, 4.93 mmol), **7.4** (1.84 g, 6.42 mmol), EDC ( 1.23 g, 6.42 mmol), DIEA (3.0 mL, 19.72 mmol) CH<sub>2</sub>Cl<sub>2</sub> (60 ml). 60 % yield. vi) a) **7.5** (1.5 g, 2.12 mmol), 4N HCl in Dioxane (50 mL). 1.5h. remove solvent under reduced pressure. 90% yield.

**Fmoc-<sup>D</sup>Pro-Dadme-Glu(OH)-Alloc (7.6).**

<sup>1</sup>H NMR (300 MHz, CDCl<sub>3</sub>) δ 1.21 (s, 3H), 1.30 (s, 3H), 1.82-2.08 (m, 6H), 2.31-2.46 (m, 2H), 3.44-3.75 (m, 6H), 4.04-4.47(m, 6H), 5.12-5.26 (m, 2H), 5.82-5.92 (m, 2H), 6.36 (s, 1H), 7.31-7.37 (m, 4H), 7.59 (d, *J* = 6.6 Hz, 2H). 7.74 (d, *J* = 7.6 Hz, 2H). <sup>13</sup>C NMR (300 MHz, CDCl<sub>3</sub>) δ 24.7, 24.8, 24.9, 29.9, 30.0, 30.4, 42.8, 43.0, 47.3, 58.3, 61.9, 66.0, 68.0, 71.3, 72.5, 111.2, 117.9, 120.1, 124.5, 125.3, 127.3, 127.4, 141.5, 143.8, 172.4, 175.9, 179.4 ESI-MS calc. = [C<sub>33</sub>H<sub>40</sub>N<sub>4</sub>O<sub>8</sub>Na]<sup>+</sup>= 643.2846, obs. [C<sub>29</sub>H<sub>34</sub>N<sub>4</sub>O<sub>8</sub>Na]<sup>+</sup>= 643.0964.

## Scheme 8. Synthesis of the cyclic peptide 9

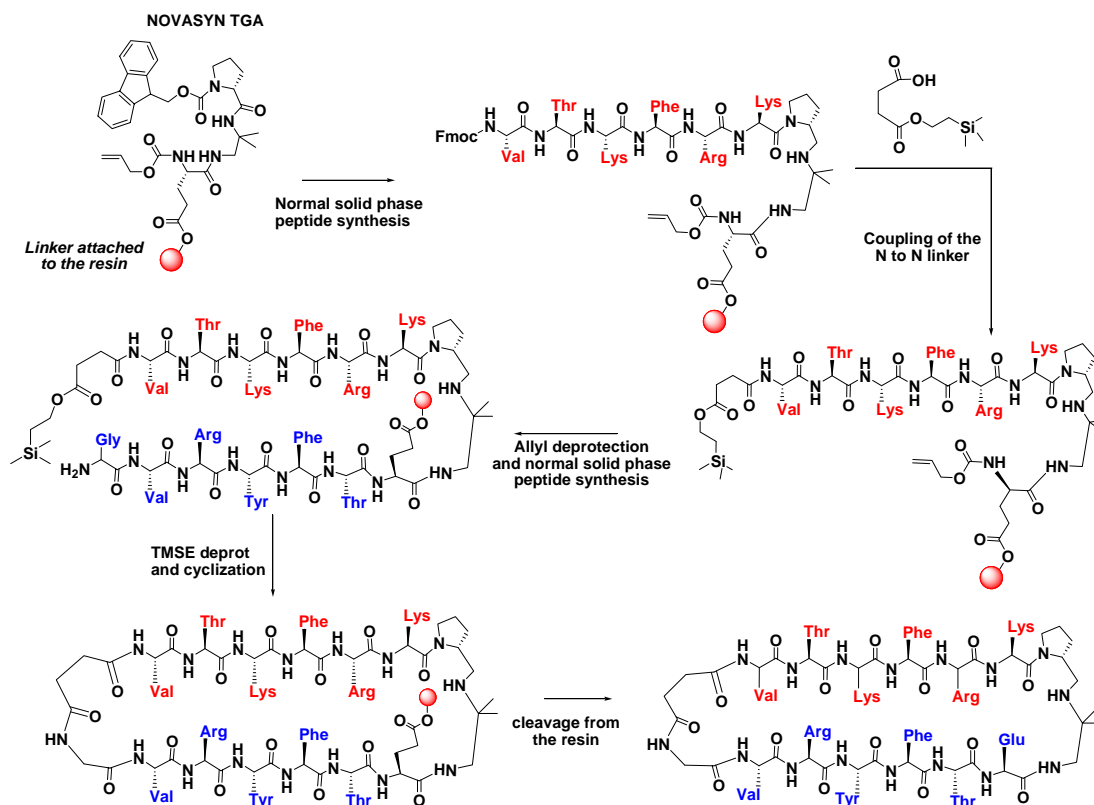

Synthesis of cyclic peptide (**9**) began with the preparation in solution of the fragment Fmoc-<sup>D</sup>Pro-Dadme-Glu(OH)-Alloc (**7.6**), described in Scheme 7. This fragment was attached to Nova Syn TGA resin via the Glu side chain carboxyl group, and residues corresponding to Lys(14) to Val(9) were appended via Fmoc-based solid phase synthesis, using standard Fmoc procedures. Fmoc amino acids were activated as HOBT esters with HBTU and DIEA. All amino acid with reactive side chains were protected. The N-to-N linker unit (**4.6**) was treated as an amino acid and coupled to the Val(9) using the protocol for normal couplings. The alloc protecting group was removed with Pd<sup>0</sup> catalyst, and the amino acids residues corresponding to Thr(2) through Gly(7) were introduced via standard methods. The Fmoc was removed from Gly(7). TSAF (4 eq., 4 h) was used to remove the TMSE protecting group, and cyclization was achieved on resin with standard coupling reagents (PyAOP, HOBT, DIEA in DMF).

## **NMR Protocols.**

### ***NMR sample preparation and experiments***

NMR samples were prepared by dissolving lyophilized peptides in 9:1 H<sub>2</sub>O/D<sub>2</sub>O, 100 mM pH 3.80 sodium deuterioacetate buffer (buffer pH was not corrected for isotope effects). Peptide concentrations were generally 2.5 mM. Samples were prepared with total volumes of approximately 300  $\mu$ L for 3 mm tubes and 600  $\mu$ L for 5 mm NMR tubes. Trace amounts of 2,2-dimethyl-2-silapentane-5-sulfonate (DSS) were added to samples as internal reference. The NMR samples were stable in solution for weeks to months showing no apparent precipitation of peptide or decrease in NMR signal strength over the entire period of study. In all cases sharp lines were observed in 1D spectra suggesting that the peptides were not aggregated in solution.

NMR experiments were performed on Varian INOVA 600 MHz spectrometers at 4°C using 3 mm or 5 mm probes.

Inova 600 probes

Varian 3 mm <sup>1</sup>H/<sup>13</sup>C/<sup>15</sup>N with 3 axis PFG

Varian 5 mm <sup>1</sup>H/<sup>13</sup>C/<sup>15</sup>N with 3 axis PFG

The probe thermocouple temperatures were calibrated with a methanol chemical shift thermometer. Chemical shifts measurements were performed at 5 K intervals set via the probe thermocouple calibration. The reported temperatures are presumed to be accurate to  $\approx$  1 K. Solvent suppression was achieved by 0.6-1.5 second solvent presaturation during the relaxation delay. Watergate solvent suppression as implemented in Varian's Protein Pack suite of experiments was used instead of presaturation in some ROESY and TOCSY experiments. Spectral windows of 6600 Hz were used. Standard Varina pulse sequences were used, and data were processed using Varian VNMR 6.1 software and analyzed with the sparky (ref S3) program. Shifted sine bell window functions were generally applied before Fourier transformation. For all samples GCOSY spectra were obtained in absolute mode with gradient echo coherence selection; TOCSY (ref S4) and ROESY (ref S4, S6) spectra were acquired in the sensitive mode with hypercomplex phase cycling (States-Haberkmorn method). All experiments were performed by collecting 2048 points in f2 and 300-600 points in f1. TOCSY experiments employed a standard MLEV-17 spin lock sequence with a spin lock field of 7-8 KHz and mixing time of 80 ms. ROESY experiments used spinlocking fields of 3 kHzs and mixing times of 200-250 ms. The <sup>1</sup>H chemical shift assignment of the peptides was achieved by the sequential assignment procedures (ref. S7) ROEs were characterized as strong, medium or weak based on visual comparison of well resolved geminal proton pairs.

### ***NMR Structure Ensemble Generation.***

Distance constrains were derived from the intensity of NOE cross-peaks in 600 MHz ROESY spectra with 200 ms mixing time at 277 K. Using the  $I = c \cdot r^{-6}$  approximation (ref S7) (where  $I$  is the NOE intensity,  $r$  the distance between protons, and  $c$  a constant) and the NOE between well resolved diastereotopic CH<sub>2</sub> protons as an internal standard, the interactions were grouped into very strong ( $\leq 2.5 \text{ \AA}$ ), strong ( $\leq 3.0 \text{ \AA}$ ), medium ( $\leq 3.5 \text{ \AA}$ ), and weak ( $\leq 4.5 \text{ \AA}$ ) categories. NMR structure ensembles were generated using v1.1 of CNS (ref. S9). The constraints employed for the ensembles are summarized in Table 7S-11S. The default CNS simulated annealing script, which includes high-temperature dynamics and then a cooling cycle in torsion space (with  $K_{NOE} = 150$ ) followed by further cooling in Cartesian space ( $K_{NOE} = 50$ ) and minimization ( $K_{NOE} = 75$ ), was modified in the following ways: (a) the high-temperature torsion dynamics and cooling phases were each doubled in length (2000 15-fs steps each, initially 50 000 K with cooling during the last 2000 steps); (b) the Cartesian cooling cycle (starting at 2000 K,  $K_{NOE} = 75$  or  $50 \text{ Kcal/\AA}^2$ ) was also doubled in length (6000 5-fs steps) which allowed us to ramp the  $E_{\text{repel}}$  scaled factor from 0.2 to 1.0 during the cycle; (c) chemical shift and H-bond constrains were not employed, and the dihedral angle energy function was disabled. In present study, 500 random structures were used, producing 20 accepted structures with no NOE distance restraint violations in excess of  $0.15 \text{ \AA}$ .



### Use of NMR to determine whether peptides self-associate

Diffusion experiments (ref. S9) for the extraction of the hydrodynamic radius  $R_h$  were performed by using a water-sLED pulse sequence (ref S10) through acquisition of spectra with varying gradient strength and plots of variations in signal as a function of gradient strength, according to the equation:

$$\ln I/I_0 = -\gamma^2 G^2 \delta^2 D (\Delta - \delta/3)$$
$$\ln \frac{I}{I_0} = -b \cdot D \quad b = \gamma^2 G^2 \delta^2 (\Delta - \delta/3)$$
$$D = \frac{K_b T}{6\pi\eta r_s}$$

where  $I$  refers to the peak intensity for a given gradient strength  $G$ ;  $I_0$  to the peak intensity in the absence of gradients;  $\Delta$  denotes the separation between leading edges of the gradients;  $\delta$  is the duration of the gradient pulse of strength  $G$ , and  $\gamma$  the magnetogyric ratio of  $^1\text{H}$ . A non-interacting compound, dioxane ( $R_h=2.12 \text{ \AA}$ ), was added to the peptide solutions to serve as a reference, and  $R_h^{\text{peptide}}$  was obtained from the slopes,  $S_{\text{pept}}$  and  $S_{\text{ref}}$  of the semilogarithmic fits of data for the peptide and the reference compound to the equation above according to the next equation.

$$R_h^{\text{peptide}} = \frac{\text{slope}_{\text{ref}}}{\text{slope}_{\text{pep}}} R_h^{\text{ref}}$$

The diffusion experiments were performed for peptides **3** and **10** in 90 %  $\text{H}_2\text{O}/10$  %  $\text{D}_2\text{O}$  containing 20  $\mu\text{l}$  of 1 % dioxane in  $\text{D}_2\text{O}$ , with gradient strengths between 2 and 46 G/cm at 277 K. The delays  $\Delta$  and  $\delta$  were held constant in all the experiments at 70 and 5 ms. Peak intensities for several peaks across the spectrum were measured using MestreNova 5.1.0.(ref S11). All data fitting was performed in GraphPad Prism 4 (ref S 12).

These measurements were performed for peptides **10** and **3** in a range of concentrations between 300  $\mu\text{M}$  and 9 mM, but the deduced hydrodynamic radius did not change over this range, indicating that these peptides do not form aggregates in this range of concentrations. For peptide **10**,  $R_h = 8.30 \pm 0.20$  (0.3 mM, 2.5 mM and 8 mM). For peptide **3**, the  $R_h = 8.19 \pm 0.25$  (0.3 mM, 2.5 mM and 5 mM). 1D proton NMR spectra displayed sharp peaks in this concentration range, which supports our conclusion that there is no peptide aggregation in this range of concentrations.

**Table 1S.** Proton resonances (ppm relative to DSS) for **1**:  
**c(VYFTE<sup>D</sup>P-dadme-KRFKTVG-(1S,2R)-CHDA)**  
(2.5mM peptide in 9:1 H<sub>2</sub>O:D<sub>2</sub>O pH 3.80, 100 mM acetate buffer, 277 K)

| Residue                  | HN    | H $\alpha$   | H $\beta$ , H $\beta'$ | Others                                                                       |
|--------------------------|-------|--------------|------------------------|------------------------------------------------------------------------------|
| <b>Lys1</b>              | 8.862 | 4.936        | 1.830                  | $\gamma$ 1.479, 1.587, $\delta$ 1.742, $\epsilon$ 3.017 $\tau$ 7.667,        |
| <b>Arg2</b>              | 9.051 | 4.750        | 1.788                  | $\gamma$ 1.510 $\delta$ 2.894, $\epsilon$ 6.914                              |
| <b>Phe3</b>              | 8.864 | 5.557        | 2.938, 3.085           | $\delta$ 7.142, $\epsilon$ 7.305, $\tau$ 7.256                               |
| <b>Lys4</b>              | 8.805 | 4.469        | 1.697                  | $\gamma$ 1.112, 1.209, $\delta$ 1.493, 1.606, $\epsilon$ 2.890, $\tau$ 7.728 |
| <b>Thr5</b>              | 8.730 | 4.737        | 3.771                  | $\gamma$ 0.705                                                               |
| <b>Val6</b>              | 7.998 | 4.157        | 2.201                  | $\gamma$ 0.862, 0.975                                                        |
| <b>Gly7</b>              | 8.280 | 3.773, 4.100 |                        |                                                                              |
| <b>CHDA8</b>             |       |              |                        | 3.175, 2.528, 2.107, 1.936, 1.846, 1.753, 1.546, 1.332                       |
| <b>Val9</b>              | 8.072 | 4.534        | 1.757                  | $\gamma$ 0.472, 0.672                                                        |
| <b>Arg10</b>             | 8.266 | 4.515        | 1.661                  | $\gamma$ 1.407, $\delta$ 3.063, $\epsilon$ 7.153.                            |
| <b>Tyr11</b>             | 8.745 | 5.212        | 2.568, 2.642           | $\delta$ 6.873, $\epsilon$ 6.662                                             |
| <b>Phe12</b>             | 8.840 | 4.826        | 2.637, 3.032           | $\delta$ 7.148, $\epsilon$ 7.304, $\tau$ 7.264                               |
| <b>Thr13</b>             | 8.794 | 4.890        | 3.888                  | $\gamma$ 0.988                                                               |
| <b>Glu14</b>             | 8.761 | 4.979        | 2.039, 2.083           | $\gamma$ 2.433                                                               |
| <b><sup>D</sup>Pro15</b> |       | 4.232        | 1.901, 2.272           | $\gamma$ 1.995, 2.153, $\delta$ 3.783, 3.8741                                |
| <b>Dadme16</b>           | 8.092 |              |                        | 3.456, 3.585, 1.117, 1.307                                                   |

**Table 2S.** Proton resonances (ppm relative to DSS) for **10**:  
**c(VYFTE<sup>D</sup>P-dadme-KRFKTVG-(1R,2S)-CHDA)**  
(2.5 mM peptide in 9:1 H<sub>2</sub>O:D<sub>2</sub>O pH 3.80, 100 mM acetate buffer, 277 K)

| Residue                  | HN    | H $\alpha$   | H $\beta$ , H $\beta'$ | Others                                                         |
|--------------------------|-------|--------------|------------------------|----------------------------------------------------------------|
| <b>Lys1</b>              | 8.852 | 4.934        | 1.829                  | $\gamma$ 1.485, 1.589, $\delta$ 1.760, $\epsilon$ 3.018        |
| <b>Arg2</b>              | 9.047 | 4.761        | 1.716                  | $\gamma$ 1.512, 1.795, $\delta$ 2.905, $\epsilon$ 6.914        |
| <b>Phe3</b>              | 8.833 | 5.592        | 2.917, 3.075           | $\delta$ 7.148, $\epsilon$ 7.305, $\tau$ 7.236                 |
| <b>Lys4</b>              | 8.741 | 4.537        | 1.658                  | $\gamma$ 1.058, 1.189, $\delta$ 1.448, 1.594, $\epsilon$ 2.873 |
| <b>Thr5</b>              | 8.695 | 4.782        | 3.785                  | $\gamma$ 0.748                                                 |
| <b>Val6</b>              | 8.097 | 4.261        | 1.902                  | $\gamma$ 0.828, 0.880                                          |
| <b>Gly7</b>              | 8.152 | 3.923, 3.463 |                        |                                                                |
| <b>CHDA8</b>             |       |              |                        | 3.041, 2.414, 2.070, 1.775, 1.576, 1.461, 1.333                |
| <b>Val9</b>              | 7.853 | 4.294        | 1.805                  | $\gamma$ 0.394, 0.787                                          |
| <b>Arg10</b>             | 8.378 | 4.514        | 2.639, 2.569           | $\gamma$ 1.498, 1.675, $\delta$ 3.127, $\epsilon$ 7.202        |
| <b>Tyr11</b>             | 8.661 | 5.170        | 2.557, 2.632           | $\delta$ 6.883, $\epsilon$ 6.665                               |
| <b>Phe12</b>             | 8.878 | 4.748        | 2.660, 3.056           | $\delta$ 7.153, $\epsilon$ 7.306, $\tau$ 7.229                 |
| <b>Thr13</b>             | 8.827 | 4.909        | 3.911                  | $\gamma$ 1.022                                                 |
| <b>Glu14</b>             | 8.768 | 4.985        | 2.037, 2.104           | $\gamma$ 2.425                                                 |
| <b><sup>D</sup>Pro15</b> |       | 4.247        | 1.907, 2.274           | $\gamma$ 2.054, 2.108, $\delta$ 3.810, 3.842                   |
| <b>Dadme16</b>           | 8.094 |              |                        | 3.454, 3.592, 1.124, 1.315                                     |

**Table 3S.** Proton resonances (ppm relative to DSS) for **2**:  
**c(VYFTEG-dadme-KRFKTVG-(1S,2R)-CHDA)**  
(2.5 mM peptide in 9:1 H<sub>2</sub>O:D<sub>2</sub>O pH 3.80, 100 mM acetate buffer, 277 K)

| Residue        | HN    | H $\alpha$   | H $\beta$ , H $\beta'$ | Others                                                                       |
|----------------|-------|--------------|------------------------|------------------------------------------------------------------------------|
| <b>Lys1</b>    | 8.871 | 4.916        | 1.842                  | $\gamma$ 1.496, 1.594, $\delta$ 1.764, $\epsilon$ 3.014 $\tau$ 7.682,        |
| <b>Arg2</b>    | 9.020 | 4.749        | 1.783                  | $\gamma$ 1.516, $\delta$ 2.924, $\epsilon$ 6.925                             |
| <b>Phe3</b>    | 8.855 | 5.536        | 2.957, 3.056           | $\delta$ 7.159, $\epsilon$ 7.295, $\tau$ 7.302                               |
| <b>Lys4</b>    | 8.800 | 4.473        | 1.699                  | $\gamma$ 1.109, 1.203, $\delta$ 1.495, 1.624, $\epsilon$ 2.894, $\tau$ 7.645 |
| <b>Thr5</b>    | 8.742 | 4.736        | 3.782                  | $\gamma$ 0.711                                                               |
| <b>Val6</b>    | 8.012 | 4.157        | 2.201                  | $\gamma$ 0.863, 0.966                                                        |
| <b>Gly7</b>    | 8.510 | 3.818        |                        |                                                                              |
| <b>CHDA8</b>   |       |              |                        | 3.168, 2.528, 2.096, 1.960, 1.855, 1.742, 1.531, 1.346                       |
| <b>Val9</b>    | 8.096 | 4.540        | 1.748                  | $\gamma$ 0.478, 0.676                                                        |
| <b>Arg10</b>   | 8.264 | 4.509        | 1.646                  | $\gamma$ 1.415, $\delta$ 3.066, $\epsilon$ 7.153.                            |
| <b>Tyr11</b>   | 8.752 | 5.223        | 2.580, 2.656           | $\delta$ 6.884, $\epsilon$ 6.705                                             |
| <b>Phe12</b>   | 8.836 | 4.844        | 2.657, 3.039           | $\delta$ 7.147, $\epsilon$ 7.227, $\tau$ 7.303                               |
| <b>Thr13</b>   | 8.836 | 4.880        | 3.922                  | $\gamma$ 1.015                                                               |
| <b>Glu14</b>   | 8.705 | 4.646        | 2.001                  | $\gamma$ 2.407                                                               |
| <b>Gly15</b>   | 9.186 | 3.613, 3.818 |                        |                                                                              |
| <b>Dadme16</b> | 8.097 |              |                        | 3.482, 3.532, 1.158, 1.320                                                   |

**Table 4S.** Proton resonances (ppm relative to DSS) for **11**:  
**c(VYFTEG-dadme-KRFKTVG-(1R,2S)-CHDA)**  
(2.5 mM peptide in 9:1 H<sub>2</sub>O:D<sub>2</sub>O pH 3.80, 100 acetate buffer, 277 K)

| Residue        | HN    | H $\alpha$   | H $\beta$ , H $\beta'$ | Others                                                                       |
|----------------|-------|--------------|------------------------|------------------------------------------------------------------------------|
| <b>Lys1</b>    | 8.871 | 4.898        | 1.840                  | $\gamma$ 1.494, 1.595, $\delta$ 1.770, $\epsilon$ 3.021 $\tau$ 7.699,        |
| <b>Arg2</b>    | 9.009 | 4.748        | 1.788                  | $\gamma$ 1.511, 1.782 $\delta$ 2.910, $\epsilon$ 6.921                       |
| <b>Phe3</b>    | 8.858 | 5.575        | 2.683, 2.918           | $\delta$ 7.162, $\epsilon$ 7.295, $\tau$ 7.295                               |
| <b>Lys4</b>    | 8.737 | 4.472        | 1.667                  | $\gamma$ 1.044, 1.192, $\delta$ 1.510, 1.678, $\epsilon$ 2.869, $\tau$ 7.736 |
| <b>Thr5</b>    | 8.708 | 4.782        | 3.779                  | $\gamma$ 0.743                                                               |
| <b>Val6</b>    | 7.998 | 4.268        | 1.908                  | $\gamma$ 0.844                                                               |
| <b>Gly7</b>    | 8.510 | 3.788        |                        |                                                                              |
| <b>CHDA8</b>   |       |              |                        | 3.129, 2.928, 1.846, 1.833, 1.755, 1.592, 1.484, 1.444                       |
| <b>Val9</b>    | 7.876 | 4.286        | 1.791                  | $\gamma$ 0.390, 0.773                                                        |
| <b>Arg10</b>   | 8.382 | 4.510        | 1.686                  | $\gamma$ 1.480, $\delta$ 3.127, $\epsilon$ 7.208.                            |
| <b>Tyr11</b>   | 8.675 | 5.165        | 2.539, 2.638           | $\delta$ 6.856, $\epsilon$ 6.669                                             |
| <b>Phe12</b>   | 8.867 | 4.814        | 2.669, 3.061           | $\delta$ 7.152, $\epsilon$ 7.287, $\tau$ 7.239                               |
| <b>Thr13</b>   | 8.832 | 4.890        | 3.932                  | $\gamma$ 1.023                                                               |
| <b>Glu14</b>   | 8.722 | 4.659        | 2.057                  | $\gamma$ 2.398                                                               |
| <b>Gly15</b>   | 9.188 | 3.620, 3.802 |                        |                                                                              |
| <b>Dadme16</b> | 8.092 |              |                        | 3.462, 3.539, 1.158, 1.321                                                   |

**Table 5S.** Proton resonances (ppm relative to DSS) for **3**:  
**c(VYFTE<sup>D</sup>P-dadme-KRFKTVG-succ)**  
(2.5 mM peptide in 9:1 H<sub>2</sub>O:D<sub>2</sub>O pH 3.80, 100 mM acetate buffer, 277 K)

| Residue                  | HN    | H $\alpha$   | H $\beta$ , H $\beta'$ | Others                                                  |
|--------------------------|-------|--------------|------------------------|---------------------------------------------------------|
| <b>Lys1</b>              | 8.867 | 4.939        | 1.840                  | $\gamma$ 1.480, 1.603, $\delta$ 1.755, $\epsilon$ 3.025 |
| <b>Arg2</b>              | 9.049 | 4.757        | 1.801                  | $\gamma$ 1.511, $\delta$ 2.898, $\epsilon$ 6.915        |
| <b>Phe3</b>              | 8.843 | 5.559        | 2.931, 3.076           | $\delta$ 7.292, $\epsilon$ 7.306, $\tau$ 7.240          |
| <b>Lys4</b>              | 8.781 | 4.478        | 1.692                  | $\gamma$ 1.092, 1.216, $\delta$ 1.485, $\epsilon$ 2.884 |
| <b>Thr5</b>              | 8.699 | 4.767        | 3.773                  | $\gamma$ 0.726                                          |
| <b>Val6</b>              | 8.058 | 4.206        | 2.158                  | $\gamma$ 0.863, 0.963                                   |
| <b>Gly7</b>              | 8.645 | 3.905, 4.059 |                        |                                                         |
| <b>Succ8</b>             |       |              |                        | 2.507, 2.697, 2.764                                     |
| <b>Val9</b>              | 8.357 | 4.398        | 1.768                  | $\gamma$ 0.417, 0.725                                   |
| <b>Arg10</b>             | 8.303 | 4.530        | 1.674                  | $\gamma$ 1.437 $\delta$ 3.085, $\epsilon$ 7.149         |
| <b>Tyr11</b>             | 8.737 | 5.210        | 2.562, 2.636           | $\delta$ 6.871, $\epsilon$ 6.669                        |
| <b>Phe12</b>             | 8.842 | 4.829        | 2.645, 3.042           | $\delta$ 7.147, $\epsilon$ 7.236, $\tau$ 7.307          |
| <b>Thr13</b>             | 8.798 | 4.897        | 3.893                  | $\gamma$ 1.002                                          |
| <b>Glu14</b>             | 8.761 | 5.019        | 2.061                  | $\gamma$ 2.431                                          |
| <b><sup>D</sup>Pro15</b> |       | 4.243        | 1.894, 2.278           | $\gamma$ 2.007, 2.169, $\delta$ 3.783, 3.873            |
| <b>Dadme16</b>           | 8.100 |              |                        | 3.459, 3.586, 1.123, 1.314                              |

**Table 6S.** Proton resonances (ppm relative to DSS) for **4**:  
**c(VYFTEG-dadme-KRFKTVG-succ)**  
(2.5 mM peptide in 9:1 H<sub>2</sub>O:D<sub>2</sub>O pH 3.80, 100 mM acetate buffer, 277 K)

| Residue        | HN    | H $\alpha$   | H $\beta$ , H $\beta'$ | Others                                                  |
|----------------|-------|--------------|------------------------|---------------------------------------------------------|
| <b>Lys1</b>    | 8.541 | 4.260        | 1.787                  | $\gamma$ 1.423, 1.498, $\delta$ 1.724, $\epsilon$ 3.003 |
| <b>Arg2</b>    | 8.364 | 4.314        | 1.751                  | $\gamma$ 1.537, 1.676, $\delta$ 3.098, $\epsilon$ 7.168 |
| <b>Phe3</b>    | 8.375 | 4.644        | 2.983, 3.088           | $\delta$ 7.215, $\epsilon$ 7.310, $\tau$ 7.215          |
| <b>Lys4</b>    | 8.443 | 4.249        | 1.685                  | $\gamma$ 1.282, $\delta$ 1.593, $\epsilon$ 2.932        |
| <b>Thr5</b>    | 8.464 | 4.307        | 4.102                  | $\gamma$ 1.115                                          |
| <b>Val6</b>    | 8.793 | 4.168        | 2.086                  | $\gamma$ 0.957                                          |
| <b>Gly7</b>    | 8.561 | 3.934, 3.792 |                        |                                                         |
| <b>Succ8</b>   |       |              |                        | 2.584, 2.688                                            |
| <b>Val9</b>    | 8.645 | 3.701        | 2.047                  | $\gamma$ 0.822, 0.900                                   |
| <b>Arg10</b>   | 8.652 | 4.302        | 1.635                  | $\gamma$ 1.374, 1.503 $\delta$ 3.105, $\epsilon$ 7.158  |
| <b>Tyr11</b>   | 8.565 | 4.614        | 2.821, 2.960           | $\delta$ 7.055, $\epsilon$ 6.746                        |
| <b>Phe12</b>   | 8.546 | 4.329        | 2.942, 3.091           | $\delta$ 7.215, $\epsilon$ 7.310, $\tau$ 7.215          |
| <b>Thr13</b>   | 8.311 | 4.329        | 4.137                  | $\gamma$ 1.164                                          |
| <b>Glu14</b>   | 8.596 | 4.335        | 1.972, 2.101           | $\gamma$ 2.420                                          |
| <b>Gly15</b>   | 8.561 | 3.934, 3.792 |                        |                                                         |
| <b>Dadme16</b> | 8.287 |              |                        | 3.486, 1.130, 1.125                                     |

**Table 7S.** Proton resonances (ppm relative to DSS) for **9**:  
**c(VTKFRK<sup>D</sup>P-dadme-ETFYRVG-succ)**  
(2.5m M in 9:1 H<sub>2</sub>O:D<sub>2</sub>O pH 3.80, 100 mM acetate buffer, 277 K)

| Residue                  | HN    | H $\alpha$   | H $\beta$ , H $\beta'$ | Others                                                                |
|--------------------------|-------|--------------|------------------------|-----------------------------------------------------------------------|
| <b>Glu1</b>              | 8.794 | 4.922        | 2.074                  | $\gamma$ 2.466                                                        |
| <b>Thr2</b>              | 8.639 | 4.573        | 4.135                  | $\gamma$ 1.156                                                        |
| <b>Phe3</b>              | 8.797 | 5.437        | 2.851                  | $\delta$ 7.053, $\epsilon$ 7.214, $\tau$ 7.053                        |
| <b>Tyr4</b>              | 8.629 | 4.854        | 2.705, 3.016           | $\delta$ 7.000, $\epsilon$ 6.743                                      |
| <b>Arg5</b>              | 8.708 | 5.025        | 1.680                  | $\gamma$ 1.480, $\delta$ 3.104, $\epsilon$ 7.216                      |
| <b>Val6</b>              | 8.104 | 4.060        | 2.171                  | $\gamma$ 0.744, 0.951                                                 |
| <b>Gly7</b>              | 8.804 | 0.744, 0.965 |                        |                                                                       |
| <b>Succ8</b>             |       |              |                        | 2.587, 2.780                                                          |
| <b>Val9</b>              | 8.466 | 4.427        | 1.932                  | $\gamma$ 0.806, 0.905                                                 |
| <b>Thr10</b>             | 8.385 | 4.429        | 3.880                  | $\gamma$ 0.982                                                        |
| <b>Lys11</b>             | 8.665 | 4.850        | 1.642                  | $\gamma$ 1.253, 1.134, $\delta$ 1.557, $\epsilon$ 2.784, $\tau$ 7.505 |
| <b>Phe12</b>             | 8.700 | 4.719        | 2.666, 3.032           | $\delta$ 7.053, $\epsilon$ 7.214, $\tau$ 7.053                        |
| <b>Arg13</b>             | 8.734 | 4.918        | 1.620                  | $\gamma$ 1.356, $\delta$ 3.104, $\epsilon$ 7.216                      |
| <b>Lys14</b>             | 8.637 | 4.851        | 1.824                  | $\gamma$ 1.416, $\delta$ 1.702, $\epsilon$ 2.645, $\tau$ 7.511        |
| <b><sup>D</sup>Pro15</b> |       | 4.260        | 2.102                  | $\gamma$ 2.069, $\delta$ 3.793                                        |
| <b>Dadme16</b>           | 8.244 |              |                        | 1.165, 1.343, 3.513, 3.623                                            |



**Table 8S.** Selected long distance NOEs observed for **1** in aqueous solution.  
(100 mM acetate buffer, pH 3.8, 277 K)

| Residue | H-atom | Residue | H-atom | NOE intensity |
|---------|--------|---------|--------|---------------|
| Lys(1)  | HG#    | Pro(15) | H##    | Very strong   |
| Lys(1)  | HA     | Glu(14) | HN     | Very strong   |
| Lys(1)  | HG#    | Glu(14) | HB#    | Very strong   |
| Lys(1)  | HD#    | Glu(14) | HB#    | Very strong   |
| Lys(4)  | HD#    | Tyr(11) | HD#    | Very strong   |
| Lys(4)  | HD#    | Tyr(11) | HE#    | Very strong   |
| Lys(4)  | HE#    | Val(9)  | HG#    | Very strong   |
| Lys(4)  | HE#    | Val(9)  | HG#    | Very strong   |
| Lys(4)  | HG#    | Val(9)  | HG#    | Very strong   |
| Lys(4)  | HG#    | Tyr(11) | HD#    | Very strong   |
| Lys(4)  | HD#    | Val(9)  | HG#    | Very strong   |
| Lys(4)  | HG#    | Val(9)  | HG#    | Very strong   |
| Thr(5)  | HA     | Arg(10) | HN     | Very strong   |
| Thr(5)  | HB     | Phe(3)  | HE#    | Very strong   |
| Thr(5)  | HG2#   | Phe(12) | HD#    | Very strong   |
| Thr(5)  | HG2#   | Phe(12) | HB#    | Very strong   |
| Val(6)  | HB     | Val(9)  | HG##   | Very strong   |
| Val(9)  | HA     | Val(6)  | HB     | Very strong   |
| Val(9)  | HG##   | Val(6)  | HB     | Very strong   |
| Val(9)  | HG##   | Tyr(11) | HE     | Very strong   |
| Arg(10) | HG#    | Thr(5)  | HG2#   | Very strong   |
| Phe(12) | HB#    | Phe(3)  | HZ     | Very strong   |
| Phe(12) | HB#    | Thr(5)  | HG2#   | Very strong   |
| Thr(13) | HA     | Arg(2)  | HN     | Very strong   |
| Glu(14) | HG#    | Phe(3)  | HE     | Very strong   |
| Phe(3)  | HE#    | Phe(12) | HN     | Strong        |
| Phe(3)  | HA     | Phe(12) | HN     | Strong        |
| Lys(4)  | HG#    | Val(6)  | HG##   | Strong        |
| Lys(4)  | HG#    | Arg(2)  | HG#    | Strong        |
| Thr(5)  | HA     | Arg(10) | HG#    | Strong        |
| Thr(5)  | HB     | Phe(12) | HD#    | Strong        |
| Thr(5)  | HG2#   | Phe(3)  | HE#    | Strong        |
| Val(9)  | HA     | Val(6)  | HN     | Strong        |
| Val(9)  | HB     | Val(6)  | HB     | Strong        |
| Tyr(11) | HD#    | Val(9)  | HG##   | Strong        |
| Tyr(11) | HA     | Lys(4)  | HG##   | Strong        |
| Phe(12) | HB#    | Phe(3)  | HE#    | Strong        |
| Phe(12) | HB#    | Phe(3)  | HZ     | Strong        |
| Thr(13) | HA     | Arg(2)  | HG#    | Strong        |
| Glu(14) | HG#    | Phe(12) | HD#    | Strong        |
| Lys(4)  | HG#    | Tyr(11) | HD#    | Medium        |
| Arg(10) | HG#    | Phe(3)  | HE#    | Medium        |
| Val(9)  | HB     | CHDA(8) | H21    | Medium        |
| Pro(15) | HG##   | Pro(15) | HD#    | Weak          |
| Thr(5)  | HG2#   | Phe(12) | HN     | Weak          |
| Thr(13) | HG2#   | Lys(1)  | HB#    | Weak          |

**Table 9S.** Selected long distance NOEs observed for **10** in aqueous solution.  
(100 mM acetate buffer, pH 3.8, 277 K)

| <b>Residue</b> | <b>H-atom</b> | <b>Residue</b> | <b>H-atom</b> | <b>NOE intensity</b> |
|----------------|---------------|----------------|---------------|----------------------|
| Arg(2)         | HA            | Lys(1)         | HN            | Very strong          |
| Arg(2)         | HG#           | Tyr(11)        | HD#           | Very strong          |
| Phe(3)         | HA            | Arg(2)         | HN            | Very strong          |
| Lys(4)         | HA            | Lys(4)         | HG#           | Very strong          |
| Lys(4)         | HG#           | Val(6)         | HG##          | Very strong          |
| Lys(4)         | HE#           | Val(6)         | HG##          | Very strong          |
| Lys(4)         | HE#           | Val(9)         | HG##          | Very strong          |
| Lys(4)         | HE#           | Val(9)         | HG##          | Very strong          |
| Val(6)         | HG##          | Lys(4)         | HE#           | Very strong          |
| Val(9)         | HA            | Val(6)         | HN            | Very strong          |
| Val(9)         | HG##          | Lys(4)         | HG#           | Very strong          |
| Val(9)         | HG##          | Tyr(11)        | HE#           | Very strong          |
| Arg(10)        | HN            | Thr(5)         | HA            | Very strong          |
| Phe(12)        | HB#           | Phe(3)         | HZ            | Very strong          |
| Thr(13)        | HA            | Arg(2)         | HG#           | Very strong          |
| Thr(13)        | HA            | Arg(2)         | HG#           | Very strong          |
| Thr(13)        | HA            | Arg(2)         | HN            | Very strong          |
| Thr(13)        | HG2#          | Arg(2)         | HG#           | Very strong          |
| Glu(14)        | HG#           | Phe(3)         | HE#           | Very strong          |
| Dadme(16)      | H4#           | Lys(1)         | HB#           | Very strong          |
| Arg(2)         | HD#           | Tyr(11)        | HE#           | Strong               |
| Lys(4)         | HD#           | Tyr(11)        | HE#           | Strong               |
| Lys(4)         | HN            | Tyr(11)        | HA            | Strong               |
| Lys(4)         | HG#           | Tyr(11)        | HD#           | Strong               |
| Lys(4)         | HB#           | Tyr(11)        | HD#           | Strong               |
| Thr(5)         | HA            | Arg(10)        | HN            | Strong               |
| Val(9)         | HG##          | Val(6)         | HB            | Strong               |
| Arg(10)        | HD#           | Phe(12)        | HE#           | Strong               |
| Phe(12)        | HB#           | Phe(3)         | HD#           | Strong               |
| Thr(13)        | HG2#          | Tyr(11)        | HD#           | Strong               |
| Lys(1)         | HA            | Glu(14)        | HN            | Medium               |
| Lys(1)         | HA            | Dadme(16)      | H11           | Medium               |
| Phe(3)         | HA            | Phe(12)        | HN            | Medium               |
| Thr(5)         | HG2#          | Phe(3)         | HE#           | Medium               |
| Thr(5)         | HG2#          | Arg(10)        | HG#           | Medium               |
| Thr(5)         | HG2#          | Phe(12)        | HD#           | Medium               |
| Thr(5)         | HG2#          | Phe(12)        | HZ            | Medium               |
| Lys(1)         | HD#           | Glu(14)        | HB#           | Medium               |
| Arg(2)         | HD#           | Lys(4)         | HD#           | Weak                 |
| Thr(5)         | HG2#          | Arg(10)        | HG#           | Weak                 |
| Phe(12)        | HA            | Phe(3)         | HE#           | Weak                 |

**Table 10S.** Selected long distance NOEs observed for **3** in aqueous solution.  
(100 mM acetate buffer, pH 3.8, 277 K)

| <b>Residue</b> | <b>H-atom</b> | <b>Residue</b> | <b>H-atom</b> | <b>NOE intensity</b> |
|----------------|---------------|----------------|---------------|----------------------|
| Lys(1)         | HA            | Glu(14)        | HN            | Very strong          |
| Lys(4)         | HE#           | Val(9)         | HG##          | Very strong          |
| Thr(5)         | HA            | Arg(10)        | HN            | Very strong          |
| Thr(5)         | HB            | Phe(3)         | HZ            | Very strong          |
| Val(9)         | HA            | Val(6)         | HB            | Very strong          |
| Val(9)         | HG##          | Val(6)         | HB            | Very strong          |
| Tyr(11)        | HA            | Lys(4)         | HN            | Very strong          |
| Phe(12)        | HB#           | Phe(3)         | HE#           | Very strong          |
| Thr(13)        | HA            | Arg(2)         | HN            | Very strong          |
| Thr(5)         | HG2#          | Arg(10)        | HH##          | Very strong          |
| Val(9)         | HG##          | Tyr(11)        | HE#           | Very strong          |
| Val(9)         | HA            | Val(6)         | HN#           | Strong               |
| Tyr(11)        | HD#           | Lys(4)         | HE#           | Strong               |
| Tyr(11)        | HE#           | Lys(4)         | HE#           | Strong               |
| Tyr(11)        | HD#           | Lys(4)         | HD#           | Strong               |
| Tyr(11)        | HE#           | Lys(4)         | HD#           | Strong               |
| Tyr(11)        | HD#           | Lys(4)         | HD#           | Strong               |
| Thr(13)        | HA            | Arg(2)         | HB#           | Strong               |
| Thr(13)        | HA            | Arg(2)         | HB#           | Strong               |
| Glu(14)        | HG#           | Phe(12)        | HE#           | Strong               |
| Glu(14)        | HG#           | Phe(12)        | HZ            | Strong               |
| Lys(1)         | HA            | Dadme(16)      | H11           | Medium               |
| Thr(5)         | HG2#          | Phe(12)        | HB#           | Medium               |
| Thr(5)         | HG2#          | Arg(10)        | HG#           | Medium               |
| Glu(14)        | HG#           | Phe(12)        | HB#           | Medium               |
| Phe(12)        | HB#           | Phe(3)         | HZ            | Medium               |
| Thr(13)        | HG2#          | Arg(2)         | HG#           | Medium               |
| Arg(2)         | HG#           | Tyr(11)        | HD#           | Weak                 |
| Thr(13)        | HG2#          | Dadme(16)      | H3#           | Weak                 |
| Dadme(16)      | H4#           | Arg(2)         | HG#           | Weak                 |

**Table 11S.** Selected long distance NOEs observed for **11** in aqueous solution.  
(100 mM acetate buffer, pH 3.8, 277 K)

| <b>Residue</b> | <b>H-atom</b> | <b>Residue</b> | <b>H-atom</b> | <b>NOE intensity</b> |
|----------------|---------------|----------------|---------------|----------------------|
| Lys(1)         | HA            | Glu(14)        | HN            | Very Strong          |
| Lys(1)         | HB#           | Glu(14)        | HB#           | Very Strong          |
| Arg(2)         | HG#           | Tyr(11)        | HD#           | Very Strong          |
| Phe(3)         | HE#           | Glu(14)        | HG2#          | Very Strong          |
| Phe(3)         | HA            | Phe(12)        | HN            | Very Strong          |
| Lys(4)         | HE#           | Val(6)         | HG#           | Very Strong          |
| Lys(4)         | HE#           | Val(9)         | HG#           | Very Strong          |
| Lys(4)         | HG2#          | Val(9)         | HG#           | Very Strong          |
| Val(9)         | HA            | Val(6)         | HN            | Very Strong          |
| Val(9)         | HG#           | Tyr(11)        | HE#           | Very Strong          |
| Arg(10)        | HN            | Thr(5)         | HA            | Very Strong          |
| Tyr(11)        | HE#           | Val(6)         | HG#           | Very Strong          |
| Phe(12)        | HD#           | Thr(5)         | HG2#          | Very Strong          |
| Phe(12)        | HH#           | Thr(5)         | HG2#          | Very Strong          |
| Thr(13)        | HA            | Arg(2)         | HN            | Very Strong          |
| Phe(12)        | HE#           | Thr(5)         | HG2#          | Strong               |
| Lys(1)         | HA            | Dadme(16)      | H11           | Strong               |
| Arg(10)        | HG#           | Phe(3)         | HE#           | Medium               |
| Thr(13)        | HG2#          | Dadme(16)      | H1#           | Medium               |
| Tyr(11)        | HA            | Lys(4)         | HN            | Medium               |
| Lys(4)         | HE#           | Val(9)         | HG#           | Medium               |
| Phe(12)        | HB#           | Thr(5)         | HG2#          | Medium               |
| Arg(2)         | HD#           | Tyr(11)        | HE#           | Medium               |
| Arg(2)         | HD#           | Tyr(11)        | HD#           | Medium               |
| Lys(4)         | HG#           | Tyr(11)        | HD#           | Medium               |

**Table 12S.** Selected long distance NOEs observed for **2** in aqueous solution.  
(100 mM acetate buffer, pH 3.8, 277 K)

| <b>Residue</b> | <b>H-atom</b> | <b>Residue</b> | <b>H-atom</b> | <b>NOE intensity</b> |
|----------------|---------------|----------------|---------------|----------------------|
| Lys(1)         | HA            | Glu(14)        | HN            | Very strong          |
| Lys(1)         | HB#           | Glu(14)        | HB#           | Very strong          |
| Phe(3)         | HA            | Phe(12)        | HN            | Very strong          |
| Lys(4)         | HE#           | Val(6)         | HG#           | Very strong          |
| Lys(4)         | HG#           | Tyr(11)        | HE#           | Very strong          |
| Thr(5)         | HA            | Arg(10)        | HN            | Very strong          |
| Thr(5)         | HG2#          | Phe(3)         | HE#           | Very strong          |
| Thr(5)         | HG2#          | Phe(12)        | HD#           | Very strong          |
| Val(6)         | HB            | Val(9)         | HG##          | Very strong          |
| Val(6)         | HB            | Val(9)         | HG##          | Very strong          |
| Val(9)         | HA            | Val(6)         | HN            | Very strong          |
| Arg(10)        | HN            | Thr(5)         | HA            | Very strong          |
| Tyr(11)        | HE#           | Lys(4)         | HN            | Very strong          |
| Tyr(11)        | HA            | Lys(4)         | HN            | Very strong          |
| Thr(13)        | HA            | Arg(2)         | HN            | Very strong          |
| Glu(14)        | HG#           | Phe(3)         | HE#           | Very strong          |
| Dadme(16)      | H5#           | Arg(2)         | HD#           | Very strong          |
| Arg(2)         | HG#           | Tyr(11)        | HD#           | Strong               |
| Lys(4)         | HE#           | Val(9)         | HG#           | Strong               |
| Lys(4)         | HE#           | Tyr(11)        | HE#           | Strong               |
| Lys(4)         | HG#           | Tyr(11)        | HD#           | Strong               |
| Val(6)         | HA            | Lys(4)         | HG#           | Strong               |
| Val(9)         | HA            | Val(6)         | HB            | Strong               |
| Val(9)         | HG2#          | Tyr(11)        | HE#           | Strong               |
| Phe(12)        | HB#           | Thr(5)         | HG2#          | Strong               |
| Thr(13)        | HA            | Arg(2)         | HG#           | Strong               |
| Glu(14)        | HB#           | Phe(3)         | HD#           | Strong               |
| Glu(14)        | HG#           | Phe(12)        | HD#           | Strong               |
| CHDA(8)        | H6#           | Val(9)         | HN            | Medium               |
| Phe(3)         | HA            | Phe(12)        | HN            | Weak                 |
| Thr(5)         | HG2#          | Phe(12)        | HZ            | Weak                 |
| Arg(2)         | HG#           | Thr(13)        | HE#           | Weak                 |
| Phe(12)        | HB#           | Phe(3)         | HE#           | Weak                 |

**Table 13S.** Selected long distance NOEs observed for **9** in aqueous solution.  
(100 mM acetate buffer, pH 3.8, 277 K)

| <b>Residue</b> | <b>H-atom</b> | <b>Residue</b> | <b>H-atom</b> | <b>NOE intensity</b> |
|----------------|---------------|----------------|---------------|----------------------|
| Val(6)         | HB            | Val(9)         | HG##          | Very Strong          |
| Val(6)         | HB            | Val(9)         | HG##          | Very Strong          |
| Succ(8)        | H3#           | Val(9)         | HN            | Very Strong          |
| Succ(8)        | H3#           | Val(9)         | HG##          | Very Strong          |
| Val(9)         | HA            | Val(6)         | HB            | Very Strong          |
| Val(9)         | HG##          | Tyr(4)         | HE#           | Very Strong          |
| Val(9)         | HG##          | Succ(8)        | H3#           | Very Strong          |
| Thr(10)        | HB            | Phe(3)         | HD#           | Very Strong          |
| Lys(11)        | HG#           | Tyr(4)         | HD#           | Very Strong          |
| Lys(11)        | HG#           | Tyr(4)         | HE#           | Very Strong          |
| Lys(11)        | HG#           | Val(9)         | HG##          | Very Strong          |
| Arg(13)        | HA            | Thr(2)         | HN            | Very Strong          |
| Lys(14)        | HN            | Glu(1)         | HA            | Very Strong          |
| Thr(2)         | HG2#          | Arg(13)        | HB#           | Strong               |
| Tyr(4)         | HE#           | Val(6)         | HG2#          | Strong               |
| Arg(5)         | HB#           | Phe(3)         | HB#           | Strong               |
| Val(6)         | HG##          | Lys(11)        | HG#           | Strong               |
| Val(9)         | HB            | Val(6)         | HG##          | Strong               |
| Lys(11)        | HD#           | Val(6)         | HG##          | Strong               |
| Phe(12)        | HB#           | Phe(3)         | HD#           | Strong               |
| Dadme(16)      | H5#           | Glu(1)         | HG#           | Strong               |
| Phe(3)         | HA            | Phe(12)        | HN            | Strong               |
| Phe(3)         | HD            | Thr(10)        | HG2#          | Medium               |
| Val(9)         | HG##          | Tyr(4)         | HD#           | Medium               |
| Tyr(4)         | HD#           | Val(6)         | HG##          | Medium               |
| Lys(11)        | HA            | Tyr(4)         | HN            | Ambiguous-strong     |
| Arg(5)         | HA            | Thr(10)        | HN            | Ambiguous-strong     |

## Chemical shift deviation studies for macrocyclic peptides 10 and 11.

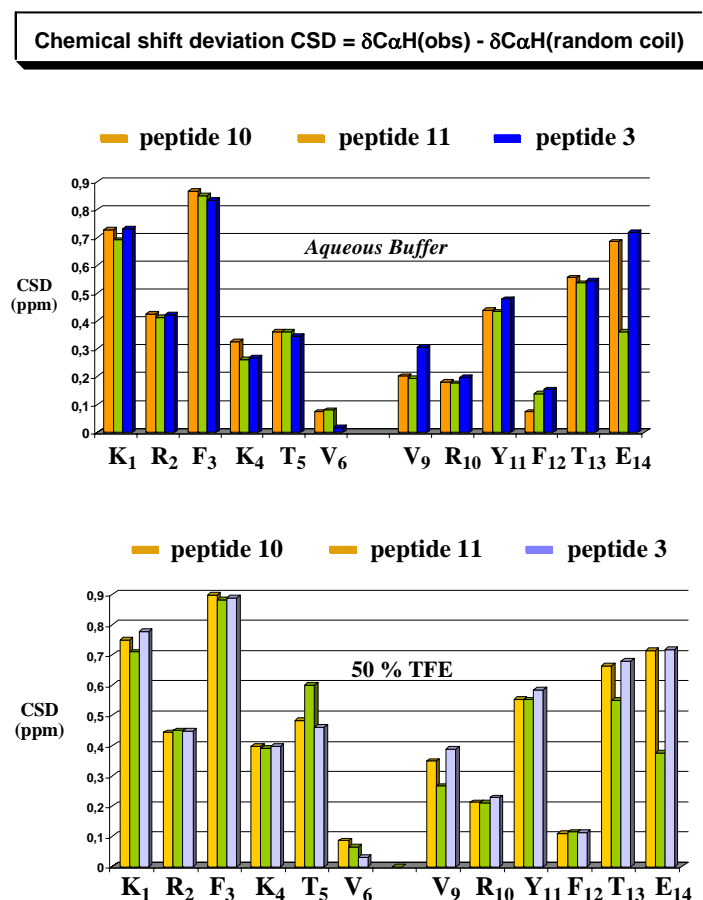

**Figure 2S.**  $\Delta\delta_{C\alpha H} = \delta_{C\alpha H}(\text{observed}) - \delta_{C\alpha H}(\text{random coil})$ , or CSD, for  $\alpha$ -amino acid residues of macrocycles **10-11** dissolved in aqueous buffer

The CSD data and the NMR-derived structures reveal very similar conformational behavior for peptides **1-3** (see Fig 2 in the main text), **10** and **11**. These similarities indicate that the presence of just one preorganized linker (along with one flexible linker) promotes parallel  $\beta$ -sheet secondary structure, i.e., that it is not necessary to use preorganized linkers for both N-to-N and C-to-C connections of the peptide strands.





***Effect of TFE on the chemical shifts of H $\alpha$  protons***

**Table 14S.** Chemical shifts of H $\alpha$  protons observed for **1** in aqueous solution with different proportions of TFE (100 mM acetate buffer/ X % TFE, pH 3.80, 278 K).

|                | Aqueous buffer | 10 % TFE | 20 % TFE | 30 % TFE | 50 % TFE |
|----------------|----------------|----------|----------|----------|----------|
| <b>Lys(1)</b>  | 4,934          | 4,93     | 4,923    | 4,945    | 4,981    |
| <b>Arg(2)</b>  | 4,75           | 4,751    | 4,741    | 4,75     | 4,789    |
| <b>Phe(3)</b>  | 5,557          | 5,557    | 5,57     | 5,585    | 5,616    |
| <b>Lys(4)</b>  | 4,469          | 4,484    | 4,526    | 4,571    | 4,603    |
| <b>Thr(5)</b>  | 4,737          | 4,758    | 4,789    | 4,848    | 4,902    |
| <b>Val(6)</b>  | 4,157          | 4,16     | 4,173    | 4,180    | 4,196    |
| <b>Val(9)</b>  | 4,534          | 4,538    | 4,544    | 4,533    | 4,551    |
| <b>Arg(10)</b> | 4,515          | 4,523    | 4,522    | 4,547    | 4,562    |
| <b>Tyr(11)</b> | 5,212          | 5,234    | 5,243    | 5,284    | 5,324    |
| <b>Phe(12)</b> | 4,826          | 4,824    | 4,818    | 4,811    | 4,811    |
| <b>Thr(13)</b> | 4,89           | 4,913    | 4,946    | 4,982    | 5,03     |
| <b>Glu(14)</b> | 4,979          | 4,973    | 4,981    | 4,994    | 5,024    |

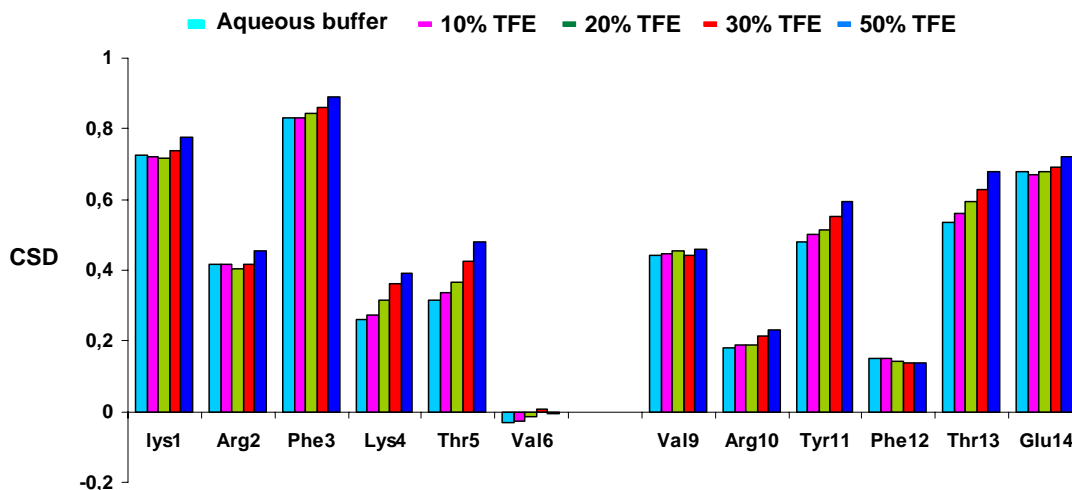

**Figure 4S.** Effect of TFE cosolvent proportion on H $\alpha$  chemical shifts in cyclic reference peptide **1** (100 mM acetate buffer/ X % TFE, pH 3.8, 278 K).

**Table 15S.** Chemical shifts of H $\alpha$  protons observed for **10** in aqueous solution with different proportions of TFE (100 mM acetate buffer/ X % TFE, pH 3.80, 278 K).

|       | Aqueous buffer | 10 % TFE | 20 % TFE | 30 % TFE | 50 % TFE |
|-------|----------------|----------|----------|----------|----------|
| lys1  | 4,934          | 4,922    | 4,919    | 4,934    | 4,956    |
| Arg2  | 4,761          | 4,759    | 4,739    | 4,748    | 4,779    |
| Phe3  | 5,592          | 5,585    | 5,601    | 5,61     | 5,623    |
| Lys4  | 4,537          | 4,488    | 4,519    | 4,559    | 4,607    |
| Thr5  | 4,782          | 4,789    | 4,807    | 4,854    | 4,905    |
| Val6  | 4,261          | 4,274    | 4,26     | 4,272    | 4,273    |
| Val9  | 4,294          | 4,307    | 4,324    | 4,375    | 4,44     |
| Arg10 | 4,514          | 4,517    | 4,516    | 4,53     | 4,546    |
| Tyr11 | 5,17           | 5,181    | 5,198    | 5,236    | 5,284    |
| Phe12 | 4,748          | 4,796    | 4,786    | 4,788    | 4,784    |
| Thr13 | 4,909          | 4,911    | 4,94     | 4,981    | 5,016    |
| Glu14 | 4,985          | 4,98     | 4,986    | 4,992    | 5,016    |

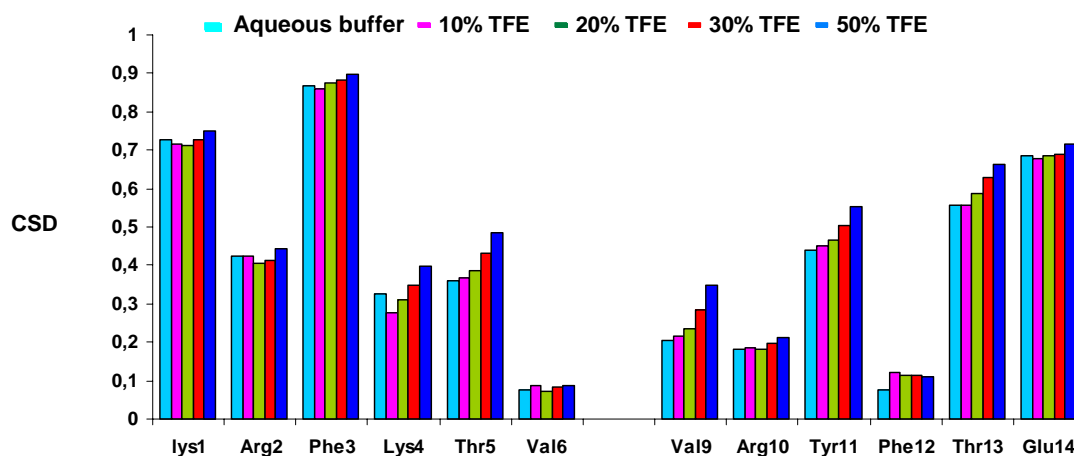

**Figure 5S.** Effect of TFE cosolvent proportion on H $\alpha$  chemical shifts in cyclic reference peptide **10** (100 mM acetate buffer/ X % TFE, pH 3.8, 278 K).

**Table 16S.** Chemical shifts of H $\alpha$  protons observed for **3** in aqueous solution with different proportions of TFE (100 mM acetate buffer/ X % TFE, pH 3.80, 278 K).

|                | Aqueous buffer | 10 % TFE | 20 % TFE | 30 % TFE | 50 % TFE |
|----------------|----------------|----------|----------|----------|----------|
| <b>Lys(1)</b>  | 4,939          | 4,929    | 4,919    | 4,917    | 4,96     |
| <b>Arg(2)</b>  | 4,757          | 4,754    | 4,741    | 4,74     | 4,766    |
| <b>Phe(3)</b>  | 5,559          | 5,57     | 5,575    | 5,582    | 5,609    |
| <b>Lys(4)</b>  | 4,478          | 4,495    | 4,521    | 4,543    | 4,597    |
| <b>Thr(5)</b>  | 4,767          | 4,785    | 4,805    | 4,822    | 4,875    |
| <b>Val(6)</b>  | 4,206          | 4,218    | 4,214    | 4,206    | 4,223    |
| <b>Val(9)</b>  | 4,398          | 4,403    | 4,407    | 4,422    | 4,466    |
| <b>Arg(10)</b> | 4,53           | 4,54     | 4,535    | 4,537    | 4,562    |
| <b>Tyr(11)</b> | 5,21           | 5,226    | 5,23     | 5,251    | 5,299    |
| <b>Phe(12)</b> | 4,829          | 4,823    | 4,811    | 4,799    | 4,794    |
| <b>Thr(13)</b> | 4,897          | 4,915    | 4,942    | 4,96     | 5,006    |

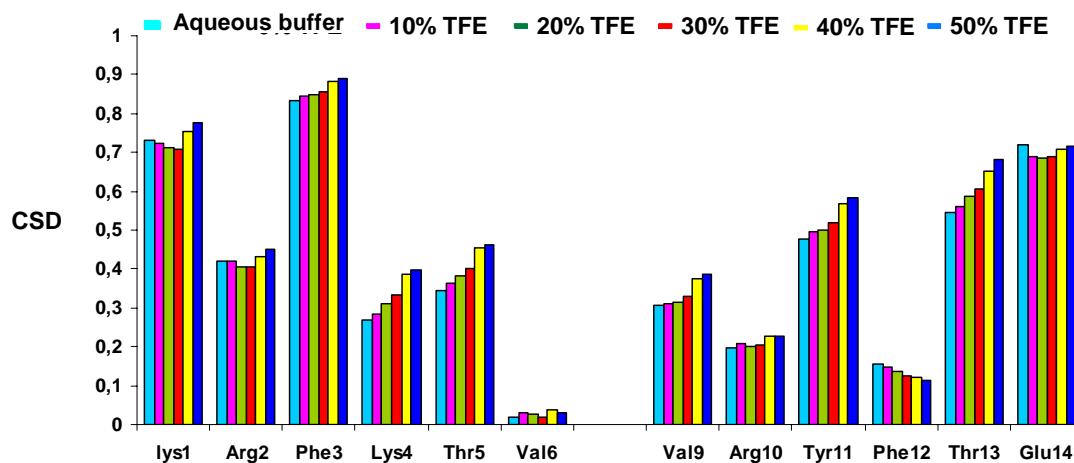

**Figure 6S.** Effect of TFE cosolvent proportion on H $\alpha$  chemical shifts in cyclic reference peptide **3** (100 mM acetate buffer/ X % TFE, pH 3.8, 278 K).

**Table 17S.** Chemical shifts of H $\alpha$  protons 2 observed for in aqueous solution with different proportions of TFE (100 mM acetate buffer/ X % TFE, pH 3.80, 278 K).

|         | Aqueous buffer | 10 % TFE | 20 % TFE | 30 % TFE | 50 % TFE |
|---------|----------------|----------|----------|----------|----------|
| Lys(1)  | 4,916          | 4,881    | 4,886    | 4,917    | 4,906    |
| Arg(2)  | 4,749          | 4,734    | 4,718    | 4,759    | 4,76     |
| Phe(3)  | 5,536          | 5,537    | 5,55     | 5,588    | 5,584    |
| Lys(4)  | 4,473          | 4,489    | 4,518    | 4,598    | 4,594    |
| Thr(5)  | 4,736          | 4,756    | 4,786    | 4,889    | 4,877    |
| Val(6)  | 4,157          | 4,168    | 4,156    | 4,334    | 4,325    |
| Val(9)  | 4,54           | 4,538    | 4,517    | 4,581    | 4,577    |
| Arg(10) | 4,509          | 4,517    | 4,522    | 4,56     | 4,561    |
| Tyr(11) | 5,233          | 5,224    | 5,24     | 5,305    | 5,303    |
| Phe(12) | 4,844          | 4,892    | 4,814    | 4,793    | 4,796    |
| Thr(13) | 4,88           | 4,9      | 4,948    | 5,012    | 5,016    |

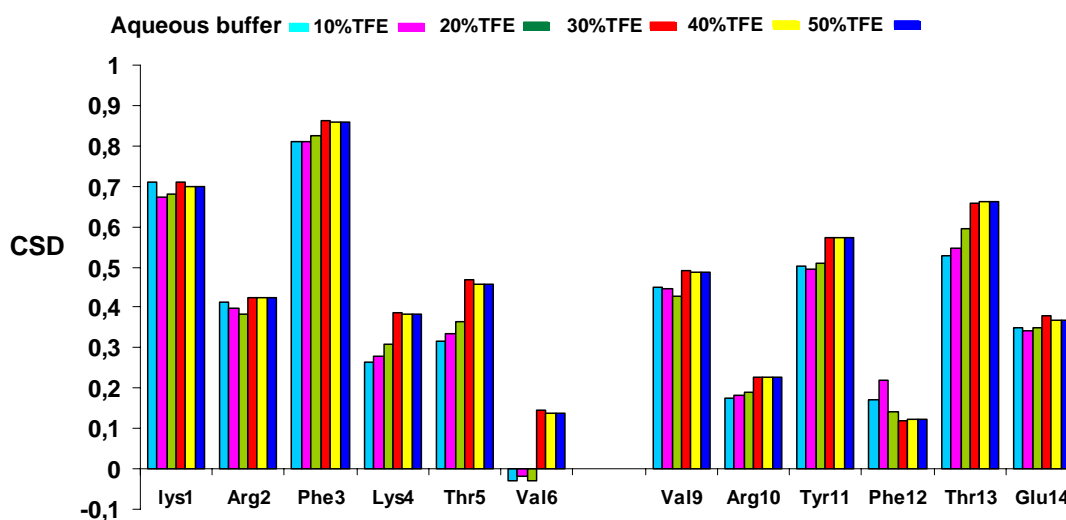

**Figure 7S.** Effect of TFE cosolvent proportion on H $\alpha$  chemical shifts in cyclic reference peptide 2 (100 mM acetate buffer/ X % TFE, pH 3.8, 278 K).

**Table 18S.** Chemical shifts of H $\alpha$  protons observed for **11** in aqueous solution with different proportions of TFE (100 mM acetate buffer/ X % TFE, pH 3.80, 278 K).

|         | Aqueous buffer | 10 % TFE | 20 % TFE | 30 % TFE | 50 % TFE |
|---------|----------------|----------|----------|----------|----------|
| Lys(1)  | 4,898          | 4,889    | 4,88     | 4,902    | 4,924    |
| Arg(2)  | 4,748          | 4,729    | 4,726    | 4,745    | 4,767    |
| Phe(3)  | 5,575          | 5,583    | 5,587    | 5,607    | 5,607    |
| Lys(4)  | 4,472          | 4,507    | 4,509    | 4,575    | 4,606    |
| Thr(5)  | 4,782          | 4,808    | 4,815    | 4,885    | 5,013    |
| Val(6)  | 4,268          | 4,274    | 4,266    | 4,276    | 4,267    |
| Val(9)  | 4,286          | 4,322    | 4,331    | 4,347    | 4,358    |
| Arg(10) | 4,51           | 4,52     | 4,513    | 4,541    | 4,547    |
| Tyr(11) | 5,165          | 5,194    | 5,198    | 5,256    | 5,279    |
| Phe(12) | 4,814          | 4,809    | 4,803    | 4,799    | 4,799    |
| Thr(13) | 4,89           | 4,926    | 4,938    | 4,986    | 4,91     |

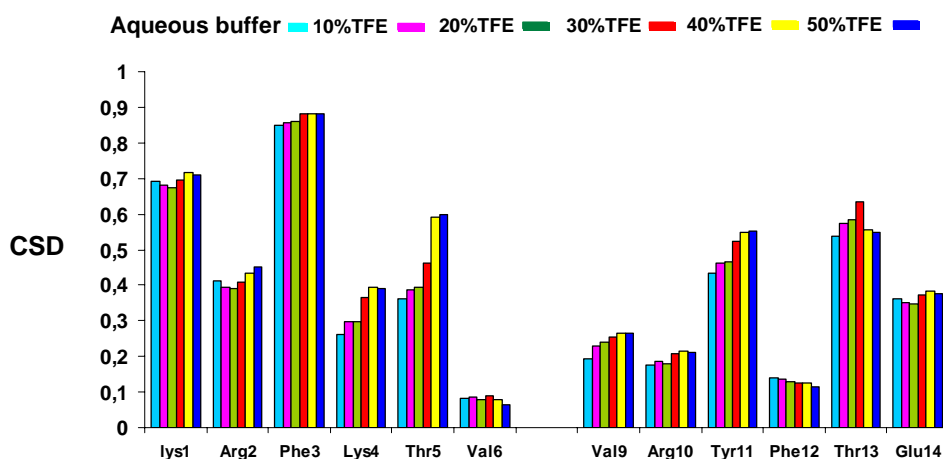

**Figure 8S.** Effect of TFE cosolvent proportion on H $\alpha$  chemical shifts in cyclic reference peptide **11** (100 mM acetate buffer/ X % TFE, pH 3.8, 278 K).

**Table 19S.** Chemical shifts of H $\alpha$  protons observed for **9** in aqueous solution with different proportions of TFE (100 mM acetate buffer/ X % TFE, pH 3.80, 278 K).

|                | Aqueous buffer | 10 % TFE | 20 % TFE | 30 % TFE | 50 % TFE |
|----------------|----------------|----------|----------|----------|----------|
| <b>Lys(14)</b> | 4,851          | 4,888    | 4,932    | 4,968    | 5,065    |
| <b>Arg(13)</b> | 4,918          | 4,906    | 4,929    | 4,949    | 4,949    |
| <b>Phe(12)</b> | 4,719          | 4,712    | 4,695    | 4,701    | 4,697    |
| <b>Lys(11)</b> | 4,85           | 4,87     | 4,848    | 4,853    | 4,843    |
| <b>Thr(10)</b> | 4,429          | 4,437    | 4,428    | 4,441    | 4,426    |
| <b>Val(9)</b>  | 4,427          | 4,418    | 4,426    | 4,122    | 4,12     |
| <b>Val(6)</b>  | 4,06           | 4,062    | 4,094    | 4,124    | 4,101    |
| <b>Arg(5)</b>  | 5,025          | 4,957    | 5,14     | 5,162    | 5,173    |
| <b>Tyr(4)</b>  | 4,854          | 4,833    | 5,005    | 4,949    | 4,969    |
| <b>Phe(3)</b>  | 5,437          | 5,459    | 5,477    | 5,472    | 5,455    |
| <b>Thr(2)</b>  | 4,573          | 4,583    | 4,631    | 4,631    | 4,652    |
| <b>Glu(1)</b>  | 4,922          | 4,918    | 4,96     | 4,96     | 5,026    |

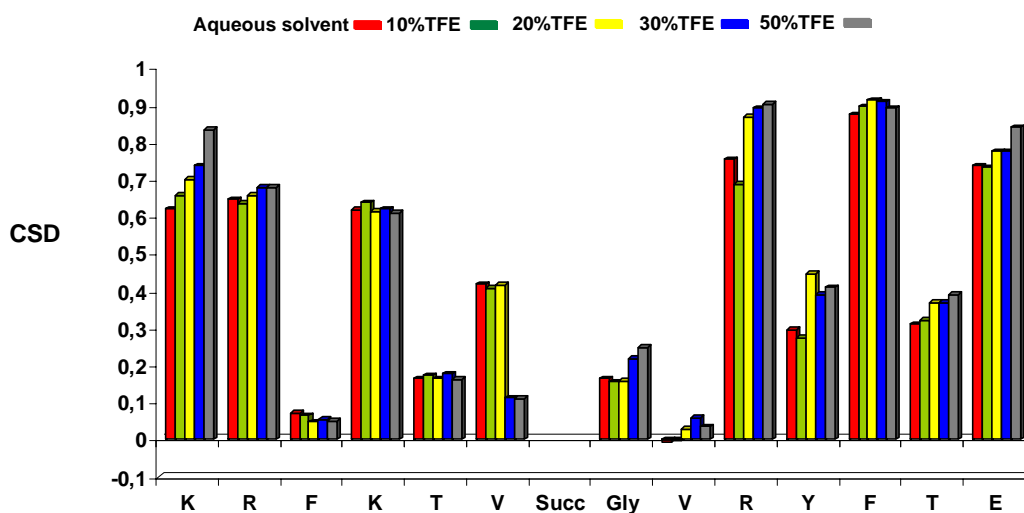

**Figure 9S.** Effect of TFE cosolvent proportion on H $\alpha$  chemical shifts in cyclic reference peptide **9** (100 mM acetate buffer/ X % TFE, pH 3.8, 278 K).

*NMR structures for macrocycles 10 and 11*

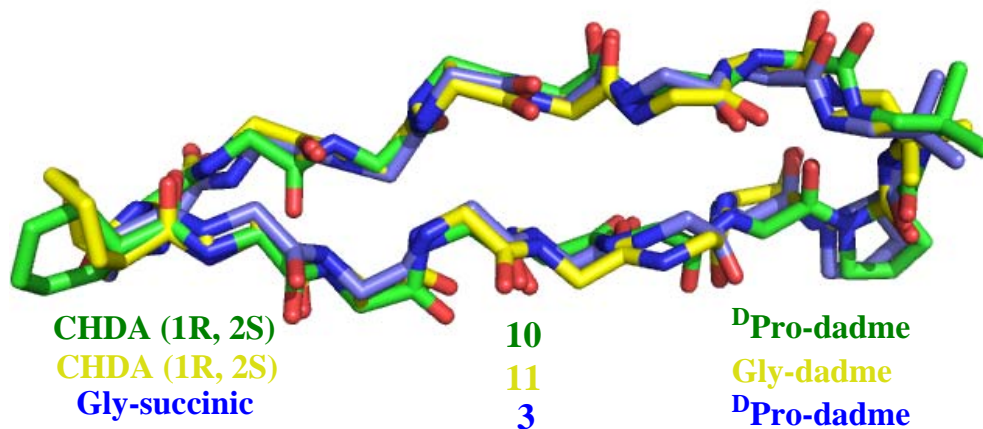

**Figure 10S.** Overlays of the lowest energy conformations identified by NOE-restrained dynamics analysis for macrocycles **3**, **10** and **11**. RMSD between the backbones of peptides **10** and **3** is 0.587 Å, and the RMSD between the backbones of peptides and **11** and **3** is 0.532 Å (linker regions not included). The image was generated with Pymol (ref S13)

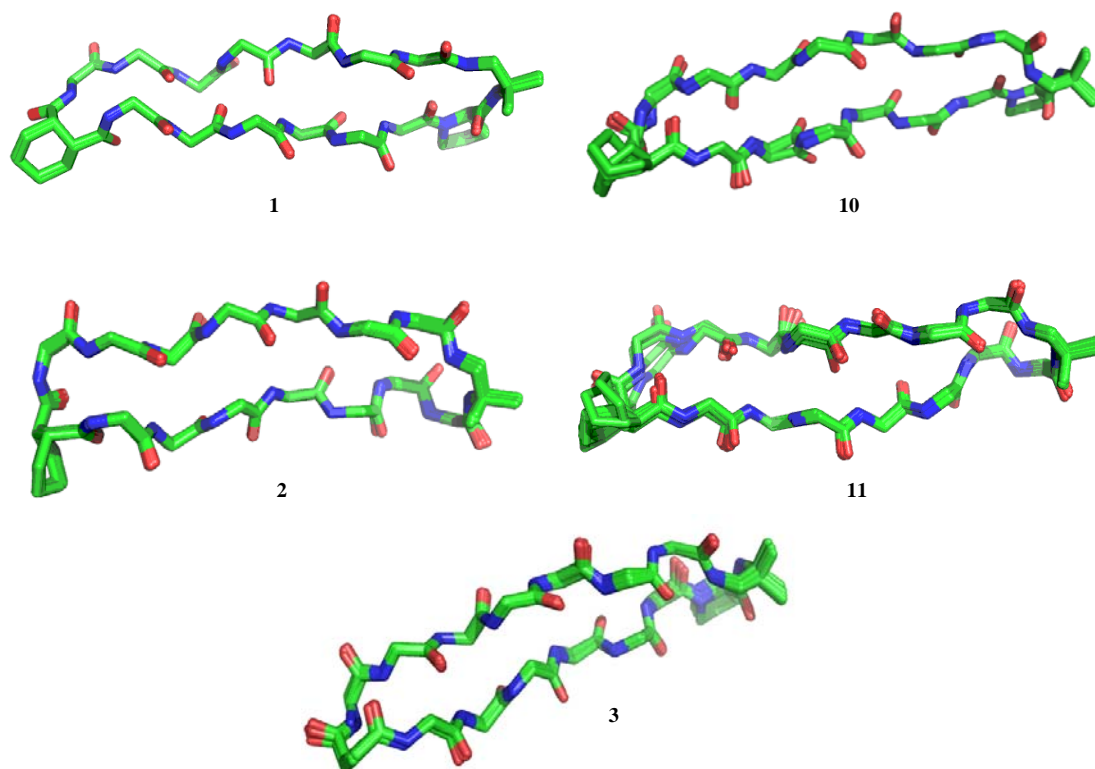

**Figure 11S.** Ten best NMR structures **1-3**, **10-11** obtained from NOE-restrained dynamics calculations using CNS. The RMSD among backbone heavy atoms for the best structures of **1** is  $0.035 \pm 0.017 \text{ \AA}$ , of **10** is  $0.119 \pm 0.088 \text{ \AA}$ , of **2** is  $0.284 \pm 0.179 \text{ \AA}$ , of **11** is  $0.149 \pm 0.064 \text{ \AA}$  and of **3** is  $0.300 \pm 0.186 \text{ \AA}$ . The image was generated with Pymol (ref S13)

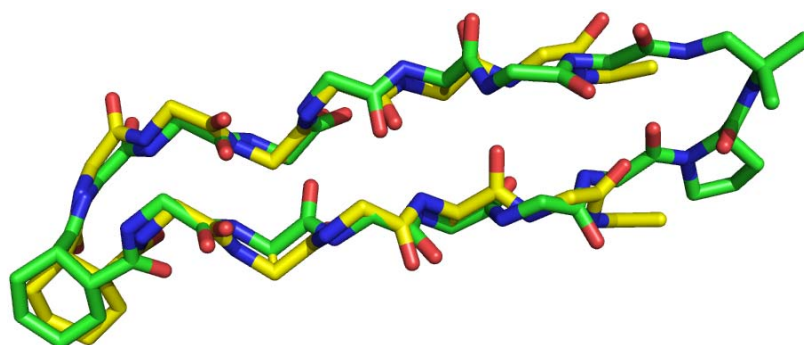

**Figure 12S.** Overlay of NMR structures for peptides **6** (yellow) and **1** (green, cyclic). The two peptides have very similar backbone conformations in these structures, which suggest that both adopt a  $\beta$ -hairpin conformation in solution. RMSD =  $0.720 \text{ \AA}$  between the sets of  $C\alpha$  backbone atoms of the two peptides (residues 3 to 12). The image was generated with Pymol. The image was generated with Pymol (ref S13)



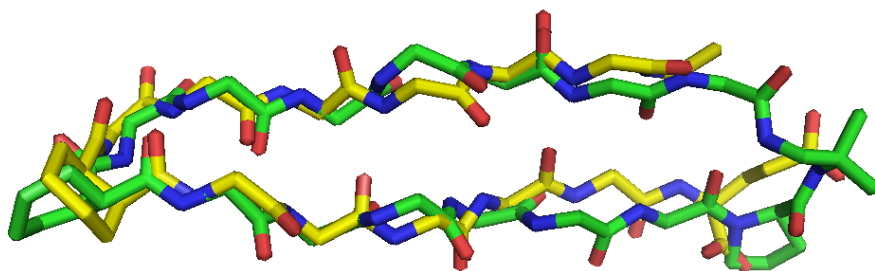

**Figure 13S.** Overlay of NMR structures for peptides **7** (yellow) and **10** (green, cyclic). The two peptides have very similar backbone conformations in these structures, which suggest that both adopt a  $\beta$ -hairpin conformation in solution. RMSD = 0.845 Å between the sets of C $\alpha$  backbone atoms of the two peptides (residues 3 to 12). The image was generated with Pymol. The image was generated with Pymol (ref S13)

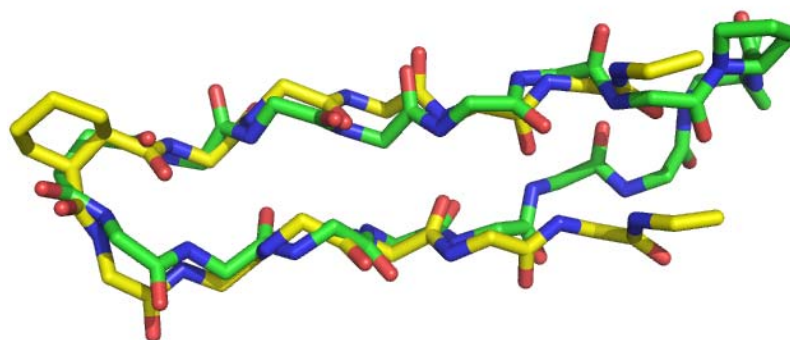

**Figure 14S.** Overlay of NMR structures for peptides **6** (yellow) and **3** (green, cyclic; the diacid portion is derived from succinic acid). The two peptides have very similar backbone conformations in these structures, which suggest that both adopt a  $\beta$ -hairpin conformation in solution. RMSD = 1.117 Å between the sets of C $\alpha$  backbone atoms of the two peptides (residues 3 to 12). The image was generated with Pymol (ref S13).

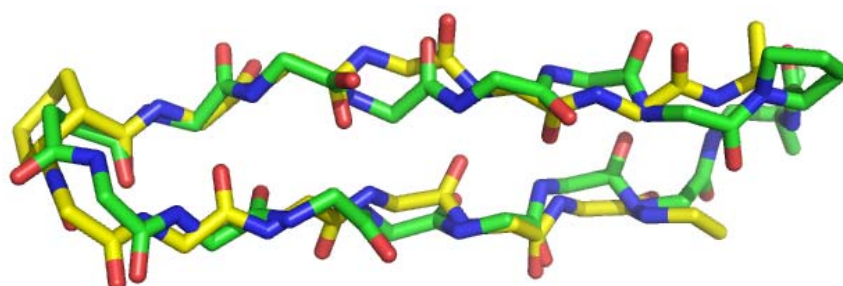

**Figure 15S.** Overlay of NMR structures for peptides **7** (yellow) and **3** (green, cyclic; the diacid portion is derived from succinic acid). The two peptides have very similar backbone conformations in these structures, which suggest that both adopt a  $\beta$ -hairpin conformation in solution. RMSD = 0.888 Å between the sets of C $\alpha$  backbone atoms of the two peptides (residues 3 to 12). The image was generated with Pymol (ref S13)

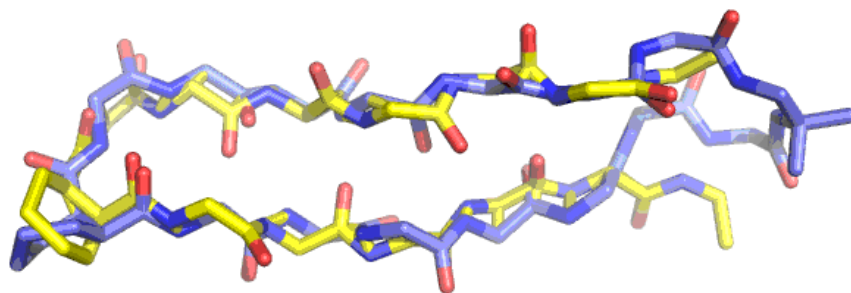

**Figure 16S.** Overlay of NMR structures for peptides **2** (yellow) and **11** (blue, cyclic; Gly instead of D-Pro). The two peptides have very similar backbone conformations in these structures, which suggest that both adopt a  $\beta$ -hairpin conformation in solution. RMSD = 1.143 Å between the sets of C $\alpha$  backbone atoms of the two peptides (residues 3 to 12). The image was generated with Pymol (ref S13)

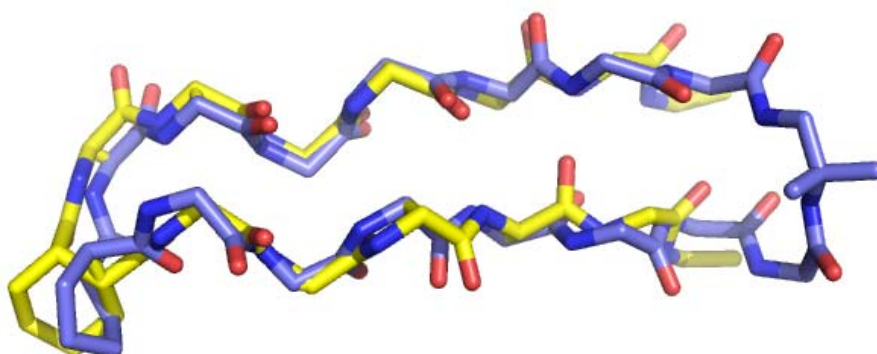

**Figure 17S.** Overlay of NMR structures for peptides **1** (yellow) and **10** (blue, cyclic; Gly instead of D-Pro). The two peptides have very similar backbone conformations in these structures, which suggest that both adopt a  $\beta$ -hairpin conformation in solution. RMSD = 0.801 Å between the sets of C $\alpha$  backbone atoms of the two peptides (residues 3 to 12). The image was generated with Pymol (ref S13)

## References.

- (S1) Bolm, C. Atodiresei, L; Schiffers, I. *Org. Syn.* **2005**, 82, 120-123
- (S2) Fisk, J. D.; Gellman, S. H. *J. Am. Chem. Soc.* **2001**, 123, 343-344.
- (S3) Goddard, D. T.; Kneller, D. G. *SPARKY 3*, University of California, San Francisco.
- (S4) Bax, A.; davies, D. G.; *J. Mag. Res.* **1985**; 65, 355.
- (S5) Jeener, J. M.; Bachmann, P.; Ernst, R. R.; *J. Chem. Phy.* **1979**, 29, 1012-1014.
- (S6) Bothner-By A. A.; Stephens R. L.; Lee, J.; Warren, C. D.; Jeanloz, R. W.; *J. Am. Chem. Soc.* **1984**; 106, 811-813.
- (S7) Wuthrich, K.; *NMR of Proteins and Nucleic Acids*; Wiley-Interscience: New York, **1986**.
- (S8) CNS: Brünger A. T.; Adams, P. D.; Clore, G. M.; DeLano, W. L.; Gros, P.; Grosse-Kunstleve, R. W.; Jiang, J. S.; Kuszewski, J.; Nilges, M.; Pannu, N. S.; Read, R. J.; Rice, L. M.; Simonson, T.; Warren, G. L. *Acta Crystallogr. D. Biol. Crystallogr.* **1998**, D54, 905-921.
- (S9) a) Cohen, Y.; Avram, L; Frish, L. *Angew, Chem. Int. Ed.* **2005**, 44, 520-554 b) Dehner A.; Kessler, H. *ChemBioChem*, **2005**, 6, 1550-1565.
- (S10) Altieri, A. S.; Hinton, D. P.; Byrd, R. A. *J. Am. Chem. Soc.* **1995**, 117, 7561-7566.
- (S11) Mestrelab Research SL.
- (S12) GraphPad Software, Inc.
- (S13) Delano Scientific LLC.
